# Supplementary material for: Perceived parenting and identification with all humanity: Insights from England and Germany
Source: PubMed Central journal article supplement (PMC9381749; doi:10.3389/fpsyg.2022.924562), 2022-08-03
Supplement: Data_Sheet_1.pdf [file Data_Sheet_1.pdf]

## *Supplementary Material*

### 1 Tables

**Table S1**

*Sociodemographic Characteristics of the Total, the German, and the English Sample*

| Variable                                |               | Total sample<br>( <i>n</i> = 3056) | German sample<br>( <i>n</i> = 1517) | English sample<br>( <i>n</i> = 1539) |
|-----------------------------------------|---------------|------------------------------------|-------------------------------------|--------------------------------------|
| Age                                     | <i>M (SD)</i> | 46.47 (15.51)                      | 46.61 (15.51)                       | 46.33 (15.51)                        |
| Gender                                  |               |                                    |                                     |                                      |
| Female                                  | <i>n (%)</i>  | 1414 (50.34%)                      | 719 (50.56%)                        | 695 (50.11%)                         |
| Male                                    | <i>n (%)</i>  | 1377 (49.02%)                      | 700 (49.23%)                        | 677 (48.81%)                         |
| Non-binary                              | <i>n (%)</i>  | 16 (0.56%)                         | 3 (0.21%)                           | 13 (0.94%)                           |
| I would rather not say                  | <i>n (%)</i>  | 2 (0.07%)                          | 0 (0%)                              | 2 (0.14%)                            |
| Total monthly household income          |               |                                    |                                     |                                      |
| £0 to £1649<br>(0€ to 1999€)            | <i>n (%)</i>  | 711 (25.31%)                       | 401 (28.20%)                        | 310 (22.35%)                         |
| £1650 to £2999<br>(2000€ to 3999€)      | <i>n (%)</i>  | 1134 (40.37%)                      | 499 (35.09%)                        | 635 (45.78%)                         |
| > £3000<br>(> 4000€)                    | <i>n (%)</i>  | 964 (34.32%)                       | 522 (36.71%)                        | 442 (31.87%)                         |
| Highest level of education <sup>1</sup> |               |                                    |                                     |                                      |
| Children's Centre                       | <i>n (%)</i>  | 6 (0.21%)                          | 2 (0.14%)                           | 4 (0.28%)                            |
| Primary school                          | <i>n (%)</i>  | 12 (0.42%)                         | 9 (0.62%)                           | 3 (0.21%)                            |
| Secondary school                        | <i>n (%)</i>  | 602 (21.01%)                       | 359 (24.93%)                        | 243 (17.05%)                         |
| Higher Level Diploma                    | <i>n (%)</i>  | 681 (23.77%)                       | 351 (24.38%)                        | 330 (23.16%)                         |
| Higher National Certificate             | <i>n (%)</i>  | 434 (15.15%)                       | 327 (22.71%)                        | 107 (7.51%)                          |
| Higher National Diploma                 | <i>n (%)</i>  | 136 (4.75%)                        | 37 (2.57%)                          | 99 (6.95%)                           |
| Bachelor's degree                       | <i>n (%)</i>  | 550 (19.20%)                       | 172 (11.94%)                        | 378 (26.52%)                         |
| Master's degree                         | <i>n (%)</i>  | 376 (13.12%)                       | 157 (10.90%)                        | 219 (15.37%)                         |
| Doctorate                               | <i>n (%)</i>  | 54 (1.88%)                         | 20 (1.39%)                          | 34 (2.39%)                           |
| Other                                   | <i>n (%)</i>  | 14 (0.49%)                         | 6 (0.42%)                           | 8 (0.56%)                            |

| Variable                                         |                        | Total sample<br>( <i>n</i> = 3056) | German sample<br>( <i>n</i> = 1517) | English sample<br>( <i>n</i> = 1539) |
|--------------------------------------------------|------------------------|------------------------------------|-------------------------------------|--------------------------------------|
| Members of a religious congregation or community | <i>n</i> (%)           | 793 (25.95%)                       | 505 (33.29%)                        | 288 (18.71%)                         |
| Grown up bilingually                             | <i>n</i> (%)           | 319 (10.44%)                       | 151 (9.95%)                         | 168 (10.92%)                         |
| Number of languages spoken fluently              | <i>M</i> ( <i>SD</i> ) | 1.46 (.76)                         | 1.61 (.79)                          | 1.31 (.69)                           |
| Having been to another country                   | <i>n</i> (%)           | 2644 (86.52%)                      | 1331 (87.74%)                       | 1313 (85.31%)                        |
| Having lived in another country                  | <i>n</i> (%)           | 724 (23.69%)                       | 259 (17.07%)                        | 465 (30.21%)                         |
| Nationalities <sup>2</sup>                       |                        |                                    |                                     |                                      |
| German                                           | <i>n</i> (%)           | 1413 (46.36%)                      | 1407 (94.81%)                       | 6 (0.38%)                            |
| English                                          | <i>n</i> (%)           | 762 (25.00%)                       | 2 (0.13%)                           | 760 (48.59%)                         |
| British                                          | <i>n</i> (%)           | 522 (17.13%)                       | 1 (0.07%)                           | 521 (33.31%)                         |
| Scottish                                         | <i>n</i> (%)           | 40 (1.31%)                         | 0 (0%)                              | 40 (2.56%)                           |
| Italian                                          | <i>n</i> (%)           | 32 (1.05%)                         | 10 (0.67%)                          | 22 (1.41%)                           |
| Irish                                            | <i>n</i> (%)           | 21 (0.69%)                         | 0 (0%)                              | 21 (1.34%)                           |
| Polish                                           | <i>n</i> (%)           | 21 (0.69%)                         | 6 (0.40%)                           | 15 (0.96%)                           |
| Welsh / Cymro / Cymraes                          | <i>n</i> (%)           | 20 (0.66%)                         | 0 (0%)                              | 20 (1.28%)                           |
| Indian                                           | <i>n</i> (%)           | 15 (0.49%)                         | 0 (0%)                              | 15 (0.96%)                           |
| French                                           | <i>n</i> (%)           | 10 (0.33%)                         | 3 (0.20%)                           | 7 (0.45%)                            |
| Romanian                                         | <i>n</i> (%)           | 10 (0.33%)                         | 2 (0.13%)                           | 8 (0.51%)                            |
| Portuguese                                       | <i>n</i> (%)           | 10 (0.33%)                         | 3 (0.20%)                           | 7 (0.45%)                            |
| Others                                           | <i>n</i> (%)           | 172 (5.64%)                        | 50 (3.37%)                          | 122 (7.80%)                          |

*Notes.* Statistics in the table refer to the data from the participants included in the final samples. Percentages always refer to the total number of people for whom the respective information was given. <sup>1</sup> Levels of education were slightly different for the English and the German sample due to national differences in the education system. The exact levels of education presented to the participants can be found in Table S3. <sup>2</sup> Only those nationalities which at least 10 participants in the total sample reported to have are listed here.

**Table S2***People for Whom Participants Assessed RPB and Attachment*

|                                                               |              | German sample<br>( <i>n</i> = 1517) | English sample<br>( <i>n</i> = 1539) |
|---------------------------------------------------------------|--------------|-------------------------------------|--------------------------------------|
| Items about the “mother” were answered for the participants’: |              |                                     |                                      |
| Biological mother                                             | <i>n</i> (%) | 1485 (97.89%)                       | 1510 (98.12%)                        |
| Stepmother                                                    | <i>n</i> (%) | 9 (0.59%)                           | 8 (0.52%)                            |
| Second mother                                                 | <i>n</i> (%) | 3 (0.20%)                           | 0 (0%)                               |
| Foster mother                                                 | <i>n</i> (%) | 5 (0.33%)                           | 1 (0.06%)                            |
| Adoptive mother                                               | <i>n</i> (%) | 3 (0.20%)                           | 11 (0.71%)                           |
| Grandmother                                                   | <i>n</i> (%) | 7 (0.46%)                           | 3 (0.19%)                            |
| Aunt                                                          | <i>n</i> (%) | 2 (0.13%)                           | 1 (0.06%)                            |
| Someone else                                                  | <i>n</i> (%) | 3 (0.20%)                           | 4 (0.26%)                            |
| Items about the “father” were answered for the participants’: |              |                                     |                                      |
| Biological father                                             | <i>n</i> (%) | 1415 (93.28%)                       | 1459 (94.80%)                        |
| Stepfather                                                    | <i>n</i> (%) | 55 (3.63%)                          | 39 (2.53%)                           |
| Second father                                                 | <i>n</i> (%) | 1 (0.07%)                           | 2 (0.13%)                            |
| Foster father                                                 | <i>n</i> (%) | 5 (0.33%)                           | 0 (0%)                               |
| Adoptive father                                               | <i>n</i> (%) | 16 (1.05%)                          | 15 (0.97%)                           |
| Grandfather                                                   | <i>n</i> (%) | 3 (0.20%)                           | 4 (0.26%)                            |
| Uncle                                                         | <i>n</i> (%) | 1 (0.07%)                           | 2 (0.13%)                            |
| Biological mother                                             | <i>n</i> (%) | 0 (0%)                              | 2 (0.13%)                            |
| Stepmother                                                    | <i>n</i> (%) | 1 (0.07%)                           | 0 (0%)                               |
| Grandmother                                                   | <i>n</i> (%) | 4 (0.26%)                           | 0 (0%)                               |
| Aunt                                                          | <i>n</i> (%) | 2 (0.13%)                           | 1 (0.06%)                            |
| Another relative                                              | <i>n</i> (%) | 0 (0%)                              | 1 (0.06%)                            |
| Someone else                                                  | <i>n</i> (%) | 14 (0.92%)                          | 14 (0.91%)                           |

*Notes.* One participant from the English sample reported to have answered the items concerning her mother for her biological father and all items about her father for her biological mother. For this participant, the given answers were switched in the analyses.

**Table S3***Levels of Education for the English and the German Sample*

| <b>Group</b> | <b>English sample</b>                                                                                                                                                                                                                                            | <b>German sample</b>                                                                                                                                                                                                                                                                                                                                                                                                                                                                                                                                                                                                                                                                                                                                                                     |
|--------------|------------------------------------------------------------------------------------------------------------------------------------------------------------------------------------------------------------------------------------------------------------------|------------------------------------------------------------------------------------------------------------------------------------------------------------------------------------------------------------------------------------------------------------------------------------------------------------------------------------------------------------------------------------------------------------------------------------------------------------------------------------------------------------------------------------------------------------------------------------------------------------------------------------------------------------------------------------------------------------------------------------------------------------------------------------------|
| 0            | <ul style="list-style-type: none"> <li>• Children's Centre (including Sure Start centre)</li> <li>• Registered Childminder</li> <li>• Day nursery</li> <li>• Reception or Nursery class in a school</li> </ul>                                                   | <ul style="list-style-type: none"> <li>• Krippe</li> <li>• Kindergarten</li> <li>• Vorschule/Vorklasse</li> </ul>                                                                                                                                                                                                                                                                                                                                                                                                                                                                                                                                                                                                                                                                        |
| 1            | <ul style="list-style-type: none"> <li>• Primary school</li> <li>• Adult literacy, numeracy and language</li> </ul>                                                                                                                                              | <ul style="list-style-type: none"> <li>• Grundschule</li> <li>• Integrierte Gesamtschule (bis Klasse 4)</li> <li>• Freie Waldorfschule (bis Klasse 4)</li> <li>• Förderschule (bis Klasse 4)</li> </ul>                                                                                                                                                                                                                                                                                                                                                                                                                                                                                                                                                                                  |
| 2            | <ul style="list-style-type: none"> <li>• Secondary school</li> <li>• GCSE (grades 3 to 1 / D to G)</li> <li>• Foundation Level Diploma</li> <li>• NVQ Level 1</li> </ul>                                                                                         | <ul style="list-style-type: none"> <li>• Allgemeiner Schulabschluss Sekundarstufe I / Mittlere Reife (Förderschule bis Klasse 10, Hauptschule, Abendhauptschule, Realschule, Abendrealschule, Integrierte Gesamtschule bis Klasse 10, Freie Waldorfschule bis Klasse 10, Gymnasium bis Klasse 9/10, Berufsfachschule, Berufsschule)</li> <li>• Berufsaufbauschule, Berufseinstiegsklasse</li> <li>• berufliche Grundbildung (Berufsfachschule)</li> <li>• Berufsvorbereitung (Berufsfachschule)</li> <li>• Berufsgrundbildungsjahr</li> <li>• Praktikum vor der Erzieher*innenausbildung</li> <li>• Berufsschule ohne Ausbildungsvertrag</li> </ul>                                                                                                                                      |
| 3            | <ul style="list-style-type: none"> <li>• Higher Level Diploma</li> <li>• Advanced Level Diploma</li> <li>• NVQ Level 2-3</li> <li>• Apprenticeship (Intermediate, Advanced)</li> <li>• GCSE (grades 9 to 4 / A* to C)</li> <li>• Access to HE Diploma</li> </ul> | <ul style="list-style-type: none"> <li>• Abitur / Allgemeiner Schulabschluss Sekundarstufe II / Allgemeine Hochschulreife / Studienberechtigung / Abschluss der gymnasialen Oberstufe (Förderschule, Freie Waldorfschule, oder Integrierte Gesamtschule bis Klasse 13, Gymnasium bis Klasse 12/13)</li> <li>• Fachabitur (Fachgymnasium, Berufsfachschule)</li> <li>• Berufliche Erstausbildung (Berufskolleg, Berufsschule, Berufsfachschule, zweijährige</li> <li>• Fachoberschule ohne Berufsausbildung)</li> <li>• Kurzausbildung in Gesundheits- und Sozialberufen (Berufsfachschule, Schule des Gesundheitswesens, Kurzprogramme)</li> <li>• Beamtenausbildung (mittlerer Dienst)</li> <li>• Vermittlung beruflicher Kenntnisse für Abiturient*innen (Berufsfachschule)</li> </ul> |

|   |                                                                                                                                                                              |                                                                                                                                                                                                                                                                                                                                                                                                                                                                                                                                                                                                                                                                                                                                                                |
|---|------------------------------------------------------------------------------------------------------------------------------------------------------------------------------|----------------------------------------------------------------------------------------------------------------------------------------------------------------------------------------------------------------------------------------------------------------------------------------------------------------------------------------------------------------------------------------------------------------------------------------------------------------------------------------------------------------------------------------------------------------------------------------------------------------------------------------------------------------------------------------------------------------------------------------------------------------|
| 4 | <ul style="list-style-type: none"> <li>• NVQ Level 4</li> <li>• Higher National Certificate (HNC)</li> </ul>                                                                 | <ul style="list-style-type: none"> <li>• Berufliche Ausbildung(en) und Studienberechtigung (Berufsschule, Fachgymnasium, Berufsfachschule)</li> <li>• Berufliche Zweitausbildung (nach vorherigem Erwerb einer Studienberechtigung)</li> <li>• Berufliche Drittausbildung (nach vorherigem Erwerb einer Studienberechtigung und einer beruflichen Ausbildung)</li> <li>• Zwei- oder dreijähriger Bildungsgang in Gesundheits- oder Sozialberuf (Berufsfachschule, Schule des Gesundheitswesens, Fachschule)</li> <li>• Abendschulabschluss Sekundarstufe II</li> <li>• Einjährige Fachoberschule mit vorheriger Berufsausbildung</li> <li>• Berufsoberschule</li> <li>• Technische Oberschule</li> <li>• Berufliche Umschulung (Berufsschule, dual)</li> </ul> |
| 5 | <ul style="list-style-type: none"> <li>• NVQ Level 5</li> <li>• Higher National Diploma (HND)</li> <li>• Diploma of Higher Education</li> <li>• Foundation degree</li> </ul> | <ul style="list-style-type: none"> <li>• Meisterausbildung (bis zu drei Jahre)</li> </ul>                                                                                                                                                                                                                                                                                                                                                                                                                                                                                                                                                                                                                                                                      |
| 6 | <ul style="list-style-type: none"> <li>• Bachelor's degree</li> </ul>                                                                                                        | <ul style="list-style-type: none"> <li>• Meisterausbildung (drei Jahre oder länger)</li> <li>• Fachschulausbildung (Erzieher*in, Techniker*in, Fachwirt*in, Betriebswirtschaft, Informationstechnik, Hauswirtschaft)</li> <li>• Fachakademieabschluss (Bayern)</li> <li>• Erzieher*innenausbildung (Berufsfachschule)</li> <li>• Diplom (Berufsakademie, Verwaltungsfachhochschule, Fachhochschule)</li> <li>• Bachelor</li> </ul>                                                                                                                                                                                                                                                                                                                             |
| 7 | <ul style="list-style-type: none"> <li>• Master's degree</li> <li>• Post-graduate diploma/certificate</li> </ul>                                                             | <ul style="list-style-type: none"> <li>• Master</li> <li>• Diplom (Universität)</li> <li>• Aufbau-/Ergänzungsstudium (Universität)</li> </ul>                                                                                                                                                                                                                                                                                                                                                                                                                                                                                                                                                                                                                  |
| 8 | <ul style="list-style-type: none"> <li>• Doctorate</li> </ul>                                                                                                                | <ul style="list-style-type: none"> <li>• Promotion</li> </ul>                                                                                                                                                                                                                                                                                                                                                                                                                                                                                                                                                                                                                                                                                                  |
| 9 | <ul style="list-style-type: none"> <li>• Other</li> </ul>                                                                                                                    | <ul style="list-style-type: none"> <li>• Anderer</li> </ul>                                                                                                                                                                                                                                                                                                                                                                                                                                                                                                                                                                                                                                                                                                    |

**Table S4***Values Entered in the Power Analysis for the Positive Model*

| Parameter                                                               | Value |
|-------------------------------------------------------------------------|-------|
| <b>Factor loading</b>                                                   |       |
| Warmth/Support measured by ZKE Items 1 and 4                            | 0.64  |
| Warmth/Support measured by ZKE Items 2 and 3                            | 0.61  |
| Positive Parenting measured by EPEP Items 1 and 4                       | 0.73  |
| Positive Parenting measured by EPEP Items 2 and 3                       | 0.68  |
| Love measured by LVE Items 1 and 2                                      | 0.68  |
| Love measured by LVE Items 3 and 4                                      | 0.68  |
| Trust measured by IPPA Items 13 and 21                                  | 0.66  |
| Trust measured by IPPA Items 1 and 4                                    | 0.7   |
| Communication measured by IPPA Items 15 and 19                          | 0.67  |
| Communication measured by IPPA Items 16 and 24                          | 0.7   |
| GSD measured by IWAH Items 1 and 4                                      | 0.65  |
| GSD measured by IWAH Items 2 and 3                                      | 0.67  |
| GSI measured by IWAH Items 6 and 7                                      | 0.67  |
| GSI measured by IWAH Items 8 and 9                                      | 0.69  |
| <b>Covariance</b>                                                       |       |
| Variance of Warmth/Support covaries with variance of GSD                | 0.2   |
| Variance of Positive Parenting covaries with variance of GSD            | 0.2   |
| Variance of Love covaries with variance of GSD                          | 0.2   |
| Variance of Trust covaries with variance of GSD                         | 0.2   |
| Variance of Communication covaries with variance of GSD                 | 0.2   |
| Variance of Warmth/Support covaries with variance of GSI                | 0.2   |
| Variance of Positive Parenting covaries with variance of GSI            | 0.2   |
| Variance of Love covaries with variance of GSI                          | 0.2   |
| Variance of Trust covaries with variance of GSI                         | 0.2   |
| Variance of Communication covaries with variance of GSI                 | 0.2   |
| Variance of Warmth/Support covaries with variance of Positive Parenting | 0.5   |

|                                                                        |        |
|------------------------------------------------------------------------|--------|
| Variance of Warmth/Support covaries with variance of Love              | 0.5    |
| Variance of Warmth/Support covaries with variance of Trust             | 0.3    |
| Variance of Warmth/Support covaries with variance of Communication     | 0.3    |
| Variance of Positive Parenting covaries with variance of Love          | 0.5    |
| Variance of Positive Parenting covaries with variance of Trust         | 0.24   |
| Variance of Positive Parenting covaries with variance of Communication | 0.37   |
| Variance of Love covaries with variance of Trust                       | 0.5    |
| Variance of Love covaries with variance of Communication               | 0.5    |
| Variance of Trust covaries with variance of Communication              | 0.76   |
| Variance of GSD covaries with variance of GSI                          | 0.77   |
| Residual variance                                                      |        |
| Residual variance of ZKE Items 1 and 4                                 | 0.5904 |
| Residual variance of ZKE Items 2 and 3                                 | 0.6279 |
| Residual variance of EPEP Items 1 and 4                                | 0.4671 |
| Residual variance of EPEP Items 2 and 3                                | 0.5376 |
| Residual variance of LVE Items 1 and 2                                 | 0.5376 |
| Residual variance of LVE Items 3 and 4                                 | 0.5376 |
| Residual variance of IPPA Items 13 and 21                              | 0.5644 |
| Residual variance of IPPA Items 1 and 4                                | 0.51   |
| Residual variance of IPPA Items 15 and 19                              | 0.5511 |
| Residual variance of IPPA Items 16 and 24                              | 0.51   |
| Residual variance of IWAH Items 1 and 4                                | 0.5775 |
| Residual variance of IWAH Items 2 and 3                                | 0.5511 |
| Residual variance of IWAH Items 6 and 7                                | 0.5511 |
| Residual variance of IWAH Items 8 and 9                                | 0.5239 |

---

*Notes.* Variances of all latent variables were fixed and are therefore not reported here. GSD = Global self-definition, GSI = Global self-investment. The following abbreviations were used for the different questionnaires: ZKE = „Zürcher Kurzfragebogen zum Erziehungsverhalten”, EPEP = “Evaluation des Pratiques Educatives Parentales”, LVE = items measuring parental love, IPPA = “Inventory of Parent and Peer Attachment”, IWAH = “Identification With All Humanity scale”.

**Table S5***Values Entered in the Power Analysis for the Negative Model*

| Parameter                                                      | Value  |
|----------------------------------------------------------------|--------|
| <b>Factor loading</b>                                          |        |
| Indifference measured by MOPS Items 5 and 13                   | 0.87   |
| Indifference measured by MOPS Items 12 and 8                   | 0.85   |
| Abuse measured by MOPS Items 2 and 14                          | 0.65   |
| Abuse measured by MOPS Items 15 and 7                          | 0.59   |
| Overcontrol measured by MOPS Items 4 and 3                     | 0.55   |
| Overcontrol measured by MOPS Items 1 and 6                     | 0.57   |
| GSD measured by IWAH Items 1 and 4                             | 0.65   |
| GSD measured by IWAH Items 2 and 3                             | 0.67   |
| GSI measured by IWAH Items 6 and 7                             | 0.67   |
| GSI measured by IWAH Items 8 and 9                             | 0.69   |
| <b>Covariance</b>                                              |        |
| Variance of Indifference covaries with variance of GSD         | -0.2   |
| Variance of Abuse covaries with variance of GSD                | -0.2   |
| Variance of Overcontrol covaries with variance of GSD          | -0.2   |
| Variance of Indifference covaries with variance of GSI         | -0.2   |
| Variance of Abuse covaries with variance of GSI                | -0.2   |
| Variance of Overcontrol covaries with variance of GSI          | -0.2   |
| Variance of Indifference covaries with variance of Abuse       | 0.72   |
| Variance of Indifference covaries with variance of Overcontrol | 0.54   |
| Variance of Abuse covaries with variance of Overcontrol        | 0.61   |
| Variance of GSD covaries with variance of GSI                  | 0.77   |
| <b>Residual variance</b>                                       |        |
| Residual variance of MOPS Items 5 and 13                       | 0.2431 |
| Residual variance of MOPS Items 12 and 8                       | 0.2775 |
| Residual variance of MOPS Items 2 and 14                       | 0.5775 |
| Residual variance of MOPS Items 15 and 7                       | 0.6519 |



|                                         |        |
|-----------------------------------------|--------|
| Residual variance of MOPS Items 4 and 3 | 0.6975 |
| Residual variance of MOPS Items 1 and 6 | 0.6751 |
| Residual variance of IWAH Items 1 and 4 | 0.5775 |
| Residual variance of IWAH Items 2 and 3 | 0.5511 |
| Residual variance of IWAH Items 6 and 7 | 0.5511 |
| Residual variance of IWAH Items 8 and 9 | 0.5239 |

---

*Notes.* Variances of all latent variables were fixed and are therefore not reported here. GSD = Global self-definition, GSI = Global self-investment. The following abbreviations were used for the two different questionnaires: MOPS = “Measure of Parental Style”, IWAH = “Identification With All Humanity scale”.

**Table S6***Positive Model Allowing for all Correlations in the German Sample: Estimated Parameters*

| Parameters         | Estimate | SE    | z-value | p-value   | Std.<br>estimate |
|--------------------|----------|-------|---------|-----------|------------------|
| Factor loadings    |          |       |         |           |                  |
| GSD → IWAH 1 & 4   | 1        |       |         |           | 0.863            |
| GSD → IWAH 2 & 3   | 1.121    | 0.029 | 39.130  | < .001*** | 0.888            |
| GSI → IWAH 6 & 7   | 1        |       |         |           | 0.913            |
| GSI → IWAH 8 & 9   | 1.013    | 0.024 | 42.691  | < .001*** | 0.876            |
| WrS → ZKE 1 & 3    | 1        |       |         |           | 0.936            |
| WrS → ZKE 2 & 4    | 1.003    | 0.013 | 80.107  | < .001*** | 0.942            |
| PoP → EPEP 1 & 4   | 1        |       |         |           | 0.669            |
| PoP → EPEP 2 & 3   | 1.411    | 0.113 | 12.442  | < .001*** | 0.912            |
| Lve → LVE 1 & 2    | 1        |       |         |           | 0.946            |
| Lve → LVE 3 & 4    | 0.962    | 0.011 | 88.501  | < .001*** | 0.950            |
| Cmm → IPPA 15 & 19 | 1        |       |         |           | 0.961            |
| Cmm → IPPA 16 & 24 | 0.978    | 0.010 | 100.705 | < .001*** | 0.953            |
| Cmm → IPPA 13 & 21 | 0.514    | 0.028 | 18.096  | < .001*** | 0.530            |
| Cmm → EPEP 1 & 4   | 0.274    | 0.052 | 5.298   | < .001*** | 0.288            |
| Trs → IPPA 13 & 21 | 1        |       |         |           | 0.460            |
| Trs → IPPA 1 & 4   | 2.154    | 0.145 | 14.888  | < .001*** | 0.978            |
| Covariances        |          |       |         |           |                  |
| GSD, GSI           | 2.215    | 0.102 | 21.629  | < .001*** | 0.774            |
| WrS                | 0.154    | 0.037 | 4.178   | < .001*** | 0.128            |
| PoP                | 0.150    | 0.029 | 5.098   | < .001*** | 0.173            |
| Lve                | 0.144    | 0.038 | 3.751   | < .001*** | 0.115            |
| Cmm                | 0.245    | 0.042 | 5.809   | < .001*** | 0.180            |
| Trs                | 0.071    | 0.019 | 3.671   | < .001*** | 0.117            |
| GSI, WrS           | 0.236    | 0.046 | 5.080   | < .001*** | 0.155            |
| PoP                | 0.192    | 0.036 | 5.277   | < .001*** | 0.176            |
| Lve                | 0.216    | 0.048 | 4.469   | < .001*** | 0.137            |
| Cmm                | 0.220    | 0.052 | 4.225   | < .001*** | 0.128            |
| Trs                | 0.074    | 0.024 | 3.113   | .002**    | 0.097            |
| WrS, PoP           | 0.445    | 0.037 | 12.019  | < .001*** | 0.970            |
| Lve                | 0.664    | 0.021 | 31.486  | < .001*** | 0.996            |

| Parameters   | Estimate | SE    | z-value | p-value   | Std.<br>estimate |
|--------------|----------|-------|---------|-----------|------------------|
| Covariances  |          |       |         |           |                  |
| WrS, Cmm     | 0.632    | 0.021 | 30.702  | < .001*** | 0.876            |
| Trs          | 0.294    | 0.022 | 13.457  | < .001*** | 0.912            |
| PoP, Lve     | 0.435    | 0.036 | 12.059  | < .001*** | 0.910            |
| Cmm          | 0.469    | 0.041 | 11.387  | < .001*** | 0.907            |
| Trs          | 0.195    | 0.021 | 9.106   | < .001*** | 0.845            |
| Lve, Cmm     | 0.635    | 0.021 | 30.575  | < .001*** | 0.847            |
| Trs          | 0.309    | 0.023 | 13.516  | < .001*** | 0.921            |
| Cmm, Trs     | 0.312    | 0.023 | 13.390  | < .001*** | 0.859            |
| Variances    |          |       |         |           |                  |
| GSD          | 2.268    | 0.118 | 19.241  | < .001*** | 1                |
| GSI          | 3.606    | 0.155 | 23.271  | < .001*** | 1                |
| WrS          | 0.640    | 0.022 | 29.388  | < .001*** | 1                |
| PoP          | 0.329    | 0.052 | 6.320   | < .001*** | 1                |
| Lve          | 0.693    | 0.023 | 29.623  | < .001*** | 1                |
| Cmm          | 0.812    | 0.025 | 33.002  | < .001*** | 1                |
| Trs          | 0.162    | 0.021 | 7.775   | < .001*** | 1                |
| IWAH 1 & 4   | 0.778    | 0.059 | 13.236  | < .001*** | 0.256            |
| IWAH 2 & 3   | 0.765    | 0.068 | 11.227  | < .001*** | 0.211            |
| IWAH 6 & 7   | 0.721    | 0.075 | 9.574   | < .001*** | 0.167            |
| IWAH 8 & 9   | 1.123    | 0.086 | 13.088  | < .001*** | 0.233            |
| ZKE 1 & 3    | 0.090    | 0.005 | 17.304  | < .001*** | 0.124            |
| ZKE 2 & 4    | 0.081    | 0.005 | 16.812  | < .001*** | 0.112            |
| EPEP 1 & 4   | 0.088    | 0.005 | 16.854  | < .001*** | 0.119            |
| EPEP 2 & 3   | 0.132    | 0.010 | 12.902  | < .001*** | 0.168            |
| LVE 1 & 2    | 0.082    | 0.006 | 14.576  | < .001*** | 0.106            |
| LVE 3 & 4    | 0.069    | 0.007 | 10.085  | < .001*** | 0.097            |
| IPPA 15 & 19 | 0.067    | 0.006 | 11.335  | < .001*** | 0.076            |
| IPPA 16 & 24 | 0.079    | 0.006 | 13.559  | < .001*** | 0.092            |
| IPPA 13 & 21 | 0.068    | 0.004 | 15.903  | < .001*** | 0.088            |
| IPPA 1 & 4   | 0.034    | 0.011 | 3.221   | .001**    | 0.044            |

| Parameters                           | Estimate |
|--------------------------------------|----------|
| <b>R<sup>2</sup> (Reliabilities)</b> |          |
| Composite <sup>1</sup>               |          |
| Parcels                              |          |
| GSD                                  | 0.869    |
| IWAH 1 & 4                           | 0.744    |
| IWAH 2 & 3                           | 0.789    |
| GSI                                  | 0.888    |
| IWAH 6 & 7                           | 0.833    |
| IWAH 8 & 9                           | 0.767    |
| WrS                                  | 0.937    |
| ZKE 1 & 3                            | 0.876    |
| ZKE 2 & 4                            | 0.888    |
| PoP                                  | 0.922    |
| EPEP 1 & 4                           | 0.881    |
| EPEP 2 & 3                           | 0.832    |
| Lve                                  | 0.947    |
| LVE 1 & 2                            | 0.894    |
| LVE 3 & 4                            | 0.903    |
| Cmm                                  | 0.954    |
| IPPA 15 & 19                         | 0.924    |
| IPPA 16 & 24                         | 0.908    |
| Trs                                  | 0.965    |
| IPPA 13 & 21                         | 0.912    |
| IPPA 1 & 4                           | 0.956    |

*Notes.*  $N = 1517$ .  $SE$  = Standard error, Std. estimate = Standardized estimate (estimate in the fully standardized model). GSD = Global self-definition, GSI = Global self-investment, WrS = Warmth / Support, PoP = Positive parenting, Lve = Love, Trs = Trust, Cmm = Communication. The following abbreviations were used for the questionnaires: ZKE = „Zürcher Kurzfragebogen zum Erziehungsverhalten”, EPEP = “Evaluation des Pratiques Educatives Parentales”, LVE = items measuring parental love, IPPA = “Inventory of Parent and Peer Attachment”, IWAH = “Identification With All Humanity scale”. <sup>1</sup> Composite reliabilities of the factors (McDonald’s  $\omega$ ) were calculated with the reliability() function of the R package “semTools” (Jorgensen et al., 2022). For factors with cross-loadings (PoP and Trs), reliabilities were calculated using formula (2) in Raykov and Shrout (2002). \* $p < .05$ . \*\* $p < .01$ . \*\*\* $p < .001$ .

**Table S7***Positive Model Allowing for all Correlations in the English Sample: Estimated Parameters*

| Parameters         | Estimate | SE    | z-value | p-value   | Std.<br>estimate |
|--------------------|----------|-------|---------|-----------|------------------|
| Factor loadings    |          |       |         |           |                  |
| GSD → IWAH 1 & 4   | 1        |       |         |           | 0.798            |
| GSD → IWAH 2 & 3   | 1.150    | 0.041 | 27.789  | < .001*** | 0.865            |
| GSI → IWAH 6 & 7   | 1        |       |         |           | 0.893            |
| GSI → IWAH 8 & 9   | 1.039    | 0.027 | 38.347  | < .001*** | 0.900            |
| WrS → ZKE 1 & 3    | 1        |       |         |           | 0.923            |
| WrS → ZKE 2 & 4    | 1.012    | 0.013 | 79.899  | < .001*** | 0.940            |
| PoP → EPEP 1 & 4   | 1        |       |         |           | 0.651            |
| PoP → EPEP 2 & 3   | 1.492    | 0.094 | 15.948  | < .001*** | 0.938            |
| Lve → LVE 1 & 2    | 1        |       |         |           | 0.919            |
| Lve → LVE 3 & 4    | 0.928    | 0.014 | 64.525  | < .001*** | 0.936            |
| Cmm → IPPA 15 & 19 | 1        |       |         |           | 0.965            |
| Cmm → IPPA 16 & 24 | 0.975    | 0.010 | 98.082  | < .001*** | 0.954            |
| Cmm → IPPA 13 & 21 | 0.493    | 0.030 | 16.327  | < .001*** | 0.515            |
| Cmm → EPEP 1 & 4   | 0.281    | 0.038 | 7.400   | < .001*** | 0.297            |
| Trs → IPPA 13 & 21 | 1        |       |         |           | 0.469            |
| Trs → IPPA 1 & 4   | 2.044    | 0.147 | 13.938  | < .001*** | 0.968            |
| Covariances        |          |       |         |           |                  |
| GSD, GSI           | 1.895    | 0.095 | 19.848  | < .001*** | 0.692            |
| WrS                | 0.140    | 0.035 | 4.058   | < .001*** | 0.127            |
| PoP                | 0.142    | 0.026 | 5.414   | < .001*** | 0.180            |
| Lve                | 0.119    | 0.034 | 3.505   | < .001*** | 0.108            |
| Cmm                | 0.234    | 0.042 | 5.579   | < .001*** | 0.183            |
| Trs                | 0.069    | 0.019 | 3.660   | < .001*** | 0.119            |
| GSI, WrS           | 0.253    | 0.044 | 5.793   | < .001*** | 0.169            |
| PoP                | 0.206    | 0.033 | 6.151   | < .001*** | 0.193            |
| Lve                | 0.229    | 0.044 | 5.188   | < .001*** | 0.154            |
| Cmm                | 0.208    | 0.050 | 4.204   | < .001*** | 0.120            |
| Trs                | 0.090    | 0.024 | 3.754   | < .001*** | 0.115            |
| WrS, PoP           | 0.418    | 0.028 | 14.864  | < .001*** | 0.971            |
| Lve                | 0.608    | 0.021 | 28.904  | < .001*** | 1.011            |

| Parameters   | Estimate | SE    | z-value | p-value   | Std.<br>estimate |
|--------------|----------|-------|---------|-----------|------------------|
| Covariances  |          |       |         |           |                  |
| WrS, Cmm     | 0.616    | 0.020 | 30.745  | < .001*** | 0.881            |
| Trs          | 0.284    | 0.022 | 12.628  | < .001*** | 0.904            |
| PoP, Lve     | 0.400    | 0.027 | 14.886  | < .001*** | 0.933            |
| Cmm          | 0.439    | 0.031 | 14.309  | < .001*** | 0.881            |
| Trs          | 0.188    | 0.018 | 10.412  | < .001*** | 0.838            |
| Lve, Cmm     | 0.587    | 0.020 | 29.534  | < .001*** | 0.843            |
| Trs          | 0.285    | 0.022 | 12.688  | < .001*** | 0.911            |
| Cmm, Trs     | 0.310    | 0.024 | 13.072  | < .001*** | 0.851            |
| Variances    |          |       |         |           |                  |
| GSD          | 2.022    | 0.123 | 16.459  | < .001*** | 1                |
| GSI          | 3.713    | 0.173 | 21.516  | < .001*** | 1                |
| WrS          | 0.603    | 0.022 | 27.970  | < .001*** | 1                |
| PoP          | 0.307    | 0.037 | 8.319   | < .001*** | 1                |
| Lve          | 0.600    | 0.024 | 25.410  | < .001*** | 1                |
| Cmm          | 0.810    | 0.023 | 34.512  | < .001*** | 1                |
| Trs          | 0.164    | 0.022 | 7.376   | < .001*** | 1                |
| IWAH 1 & 4   | 1.156    | 0.076 | 15.143  | < .001*** | 0.364            |
| IWAH 2 & 3   | 0.904    | 0.097 | 9.307   | < .001*** | 0.253            |
| IWAH 6 & 7   | 0.944    | 0.097 | 9.782   | < .001*** | 0.203            |
| IWAH 8 & 9   | 0.940    | 0.097 | 9.730   | < .001*** | 0.190            |
| ZKE 1 & 3    | 0.105    | 0.006 | 18.450  | < .001*** | 0.148            |
| ZKE 2 & 4    | 0.082    | 0.005 | 17.258  | < .001*** | 0.117            |
| EPEP 1 & 4   | 0.107    | 0.006 | 18.947  | < .001*** | 0.147            |
| EPEP 2 & 3   | 0.093    | 0.009 | 9.811   | < .001*** | 0.119            |
| LVE 1 & 2    | 0.110    | 0.006 | 17.849  | < .001*** | 0.156            |
| LVE 3 & 4    | 0.073    | 0.005 | 15.576  | < .001*** | 0.123            |
| IPPA 15 & 19 | 0.060    | 0.006 | 9.948   | < .001*** | 0.069            |
| IPPA 16 & 24 | 0.076    | 0.006 | 13.107  | < .001*** | 0.090            |
| IPPA 13 & 21 | 0.077    | 0.005 | 16.975  | < .001*** | 0.104            |
| IPPA 1 & 4   | 0.046    | 0.011 | 4.197   | .001**    | 0.063            |

| Parameters                           | Estimate |
|--------------------------------------|----------|
| <b>R<sup>2</sup> (Reliabilities)</b> |          |
| Composite <sup>1</sup>               |          |
| Parcels                              |          |
| GSD                                  | 0.819    |
| IWAH 1 & 4                           | 0.636    |
| IWAH 2 & 3                           | 0.747    |
| GSI                                  | 0.891    |
| IWAH 6 & 7                           | 0.797    |
| IWAH 8 & 9                           | 0.810    |
| WrS                                  | 0.929    |
| ZKE 1 & 3                            | 0.852    |
| ZKE 2 & 4                            | 0.883    |
| PoP                                  | 0.928    |
| EPEP 1 & 4                           | 0.853    |
| EPEP 2 & 3                           | 0.881    |
| Lve                                  | 0.924    |
| LVE 1 & 2                            | 0.844    |
| LVE 3 & 4                            | 0.877    |
| Cmm                                  | 0.950    |
| IPPA 15 & 19                         | 0.931    |
| IPPA 16 & 24                         | 0.910    |
| Trs                                  | 0.956    |
| IPPA 13 & 21                         | 0.896    |
| IPPA 1 & 4                           | 0.937    |

*Notes.*  $N = 1539$ .  $SE$  = Standard error, Std. estimate = Standardized estimate (estimate in the fully standardized model). GSD = Global self-definition, GSI = Global self-investment, WrS = Warmth / Support, PoP = Positive parenting, Lve = Love, Trs = Trust, Cmm = Communication. The following abbreviations were used for the questionnaires: ZKE = „Zürcher Kurzfragebogen zum Erziehungsverhalten”, EPEP = “Evaluation des Pratiques Educatives Parentales”, LVE = items measuring parental love, IPPA = “Inventory of Parent and Peer Attachment”, IWAH = “Identification With All Humanity scale”. <sup>1</sup> Composite reliabilities of the factors (McDonald’s  $\omega$ ) were calculated with the reliability() function of the R package “semTools” (Jorgensen et al., 2022). For factors with cross-loadings (PoP and Trs), reliabilities were calculated using formula (2) in Raykov and Shrout (2002). \* $p < .05$ . \*\* $p < .01$ . \*\*\* $p < .001$ .

**Table S8***Negative Model Allowing for all Correlations in the German Sample: Estimated Parameters*

| Parameters        | Estimate | SE    | z-value | p-value   | Std.<br>estimate |
|-------------------|----------|-------|---------|-----------|------------------|
| Factor loadings   |          |       |         |           |                  |
| GSD → IWAH 1 & 4  | 1        |       |         |           | 0.859            |
| GSD → IWAH 2 & 3  | 1.131    | 0.029 | 38.934  | < .001*** | 0.892            |
| GSI → IWAH 6 & 7  | 1        |       |         |           | 0.907            |
| GSI → IWAH 8 & 9  | 1.026    | 0.024 | 43.234  | < .001*** | 0.881            |
| Ind → MOPS 5 & 13 | 1        |       |         |           | 0.874            |
| Ind → MOPS 12 & 8 | 1.142    | 0.029 | 39.790  | < .001*** | 0.912            |
| Abs → MOPS 2 & 14 | 1        |       |         |           | 0.903            |
| Abs → MOPS 15 & 7 | 1.051    | 0.024 | 43.195  | < .001*** | 0.890            |
| Ovr → MOPS 1 & 4  | 1        |       |         |           | 0.596            |
| Ovr → MOPS 3 & 6  | 1.721    | 0.095 | 18.189  | < .001*** | 0.866            |
| Covariances       |          |       |         |           |                  |
| GSD, GSI          | 2.193    | 0.103 | 21.308  | < .001*** | 0.775            |
| Ind               | -0.016   | 0.031 | -0.516  | 0.606     | -0.017           |
| Abs               | 0.028    | 0.031 | 0.892   | 0.372     | 0.030            |
| Ovr               | 0.022    | 0.119 | 1.146   | 0.252     | 0.042            |
| GSI, Ind          | -0.054   | 0.037 | -1.453  | 0.146     | -0.046           |
| Abs               | 0.021    | 0.035 | 0.585   | 0.558     | 0.017            |
| Ovr               | 0.005    | 0.022 | 0.208   | 0.835     | 0.007            |
| Ind, Abs          | 0.342    | 0.019 | 17.795  | < .001*** | 0.891            |
| Ovr               | 0.151    | 0.012 | 13.018  | < .001*** | 0.712            |
| Abs, Ovr          | 0.195    | 0.014 | 13.873  | < .001*** | 0.905            |
| Variances         |          |       |         |           |                  |
| GSD               | 2.249    | 0.117 | 19.151  | < .001*** | 1                |
| GSI               | 3.561    | 0.155 | 22.973  | < .001*** | 1                |
| Ind               | 0.378    | 0.022 | 16.985  | < .001*** | 1                |
| Abs               | 0.391    | 0.023 | 17.316  | < .001*** | 1                |
| Ovr               | 0.119    | 0.012 | 9.629   | < .001*** | 1                |
| IWAH 1 & 4        | 0.798    | 0.060 | 13.328  | < .001*** | 0.262            |
| IWAH 2 & 3        | 0.740    | 0.070 | 10.621  | < .001*** | 0.205            |
| IWAH 6 & 7        | 0.766    | 0.076 | 10.067  | < .001*** | 0.177            |



| Parameters                     | Estimate | SE    | z-value | p-value   | Std. estimate |
|--------------------------------|----------|-------|---------|-----------|---------------|
| Variances                      |          |       |         |           |               |
| IWAH 8 & 9                     | 1.076    | 0.085 | 12.713  | < .001*** | 0.223         |
| MOPS 5 & 13                    | 0.117    | 0.009 | 13.206  | < .001*** | 0.236         |
| MOPS 12 & 8                    | 0.100    | 0.010 | 10.137  | < .001*** | 0.168         |
| MOPS 2 & 14                    | 0.088    | 0.007 | 12.308  | < .001*** | 0.184         |
| MOPS 15 & 7                    | 0.113    | 0.008 | 13.496  | < .001*** | 0.207         |
| MOPS 1 & 4                     | 0.215    | 0.010 | 21.361  | < .001*** | 0.644         |
| MOPS 3 & 6                     | 0.117    | 0.014 | 8.286   | < .001*** | 0.249         |
| R <sup>2</sup> (Reliabilities) |          |       |         |           |               |
| Composite <sup>1</sup>         |          |       |         |           |               |
| Parcels                        |          |       |         |           |               |
| GSD                            | 0.869    |       |         |           |               |
| IWAH 1 & 4                     | 0.738    |       |         |           |               |
| IWAH 2 & 3                     | 0.795    |       |         |           |               |
| GSI                            | 0.888    |       |         |           |               |
| IWAH 6 & 7                     | 0.823    |       |         |           |               |
| IWAH 8 & 9                     | 0.777    |       |         |           |               |
| Ind                            | 0.889    |       |         |           |               |
| MOPS 5 & 13                    | 0.764    |       |         |           |               |
| MOPS 12 & 8                    | 0.832    |       |         |           |               |
| Abs                            | 0.891    |       |         |           |               |
| MOPS 2 & 14                    | 0.816    |       |         |           |               |
| MOPS 15 & 7                    | 0.793    |       |         |           |               |
| Ovr                            | 0.726    |       |         |           |               |
| MOPS 1 & 4                     | 0.356    |       |         |           |               |
| MOPS 3 & 6                     | 0.751    |       |         |           |               |

Notes.  $N = 1517$ .  $SE$  = Standard error, Std. estimate = Standardized estimate (estimate in the fully standardized model). GSD = Global self-definition, GSI = Global self-investment, Ind = Indifference, Abs = Abuse, Ovr = Over-control. The following abbreviations were used for the two different questionnaires: MOPS = “Measure of Parental Style”, IWAH = “Identification With All Humanity scale”. <sup>1</sup> Composite reliabilities of the factors (McDonald’s  $\omega$ ) were calculated with the reliability() function of the R package “semTools” (Jorgensen et al., 2022). \* $p < .05$ . \*\* $p < .01$ . \*\*\* $p < .001$ .

**Table S9***Negative Model Allowing for all Correlations in the English Sample: Estimated Parameters*

| Parameters        | Estimate | SE    | z-value | p-value   | Std.<br>estimate |
|-------------------|----------|-------|---------|-----------|------------------|
| Factor loadings   |          |       |         |           |                  |
| GSD → IWAH 1 & 4  | 1        |       |         |           | 0.790            |
| GSD → IWAH 2 & 3  | 1.173    | 0.042 | 28.170  | < .001*** | 0.873            |
| GSI → IWAH 6 & 7  | 1        |       |         |           | 0.891            |
| GSI → IWAH 8 & 9  | 1.042    | 0.027 | 38.017  | < .001*** | 0.901            |
| Ind → MOPS 5 & 13 | 1        |       |         |           | 0.943            |
| Ind → MOPS 12 & 8 | 0.968    | 0.018 | 53.174  | < .001*** | 0.964            |
| Abs → MOPS 2 & 14 | 1        |       |         |           | 0.924            |
| Abs → MOPS 15 & 7 | 1.052    | 0.024 | 43.709  | < .001*** | 0.934            |
| Ovr → MOPS 1 & 4  | 1        |       |         |           | 0.676            |
| Ovr → MOPS 3 & 6  | 1.621    | 0.093 | 17.369  | < .001*** | 0.938            |
| Covariances       |          |       |         |           |                  |
| GSD, GSI          | 1.870    | 0.096 | 19.514  | < .001*** | 0.690            |
| Ind               | 0.054    | 0.030 | 1.806   | 0.071     | 0.058            |
| Abs               | 0.120    | 0.027 | 4.398   | < .001*** | 0.153            |
| Ovr               | 0.087    | 0.023 | 3.737   | < .001*** | 0.151            |
| GSI, Ind          | -0.051   | 0.038 | -1.357  | 0.175     | -0.040           |
| Abs               | 0.057    | 0.032 | 1.758   | 0.079     | 0.053            |
| Ovr               | 0.070    | 0.027 | 2.546   | 0.011*    | 0.088            |
| Ind, Abs          | 0.312    | 0.022 | 14.445  | < .001*** | 0.844            |
| Ovr               | 0.177    | 0.014 | 12.975  | < .001*** | 0.648            |
| Abs, Ovr          | 0.174    | 0.015 | 11.445  | < .001*** | 0.761            |
| Variances         |          |       |         |           |                  |
| GSD               | 1.982    | 0.121 | 16.423  | < .001*** | 1                |
| GSI               | 3.701    | 0.173 | 21.355  | < .001*** | 1                |
| Ind               | 0.444    | 0.026 | 17.215  | < .001*** | 1                |
| Abs               | 0.309    | 0.024 | 12.968  | < .001*** | 1                |
| Ovr               | 0.168    | 0.016 | 10.419  | < .001*** | 1                |
| IWAH 1 & 4        | 1.195    | 0.076 | 15.753  | < .001*** | 0.376            |
| IWAH 2 & 3        | 0.851    | 0.096 | 8.879   | < .001*** | 0.238            |
| IWAH 6 & 7        | 0.956    | 0.097 | 9.830   | < .001*** | 0.205            |

| Parameters                           | Estimate | SE    | z-value | p-value   | Std. estimate |
|--------------------------------------|----------|-------|---------|-----------|---------------|
| <b>Variiances</b>                    |          |       |         |           |               |
| IWAH 8 & 9                           | 0.927    | 0.098 | 9.438   | < .001*** | 0.187         |
| MOPS 5 & 13                          | 0.056    | 0.006 | 8.769   | < .001*** | 0.112         |
| MOPS 12 & 8                          | 0.032    | 0.006 | 5.448   | < .001*** | 0.070         |
| MOPS 2 & 14                          | 0.053    | 0.005 | 10.086  | < .001*** | 0.146         |
| MOPS 15 & 7                          | 0.050    | 0.006 | 7.974   | < .001*** | 0.127         |
| MOPS 1 & 4                           | 0.200    | 0.009 | 21.984  | < .001*** | 0.543         |
| MOPS 3 & 6                           | 0.061    | 0.018 | 3.406   | .001**    | 0.121         |
| <b>R<sup>2</sup> (Reliabilities)</b> |          |       |         |           |               |
| Composite <sup>1</sup>               |          |       |         |           |               |
| Parcels                              |          |       |         |           |               |
| GSD                                  | 0.821    |       |         |           |               |
| IWAH 1 & 4                           | 0.624    |       |         |           |               |
| IWAH 2 & 3                           | 0.762    |       |         |           |               |
| GSI                                  | 0.891    |       |         |           |               |
| IWAH 6 & 7                           | 0.795    |       |         |           |               |
| IWAH 8 & 9                           | 0.813    |       |         |           |               |
| Ind                                  | 0.952    |       |         |           |               |
| MOPS 5 & 13                          | 0.888    |       |         |           |               |
| MOPS 12 & 8                          | 0.930    |       |         |           |               |
| Abs                                  | 0.927    |       |         |           |               |
| MOPS 2 & 14                          | 0.854    |       |         |           |               |
| MOPS 15 & 7                          | 0.873    |       |         |           |               |
| Ovr                                  | 0.816    |       |         |           |               |
| MOPS 1 & 4                           | 0.457    |       |         |           |               |
| MOPS 3 & 6                           | 0.879    |       |         |           |               |

Notes.  $N = 1539$ . SE = Standard error, Std. estimate = Standardized estimate (estimate in the fully standardized model). GSD = Global self-definition, GSI = Global self-investment, Ind = Indifference, Abs = Abuse, Ovr = Over-control. The following abbreviations were used for the two different questionnaires: MOPS = “Measure of Parental Style”, IWAH = “Identification With All Humanity scale”. <sup>1</sup> Composite reliabilities of the factors (McDonald’s  $\omega$ ) were calculated with the reliability() function of the R package “semTools” (Jorgensen et al., 2022). \* $p < .05$ . \*\* $p < .01$ . \*\*\* $p < .001$ .

**Table S10***Estimated Parameters of the Positive Regression Model in the German Sample*

| Parameters                     | Estimate | SE    | z-value | p-value   | Std.<br>estimate |
|--------------------------------|----------|-------|---------|-----------|------------------|
| <b>Factor loadings</b>         |          |       |         |           |                  |
| GSD → IWAH 1 & 4               | 1        |       |         |           | 0.863            |
| GSD → IWAH 2 & 3               | 1.121    | 0.029 | 39.130  | < .001*** | 0.888            |
| GSI → IWAH 6 & 7               | 1        |       |         |           | 0.913            |
| GSI → IWAH 8 & 9               | 1.013    | 0.024 | 42.691  | < .001*** | 0.876            |
| WrS → ZKE 1 & 3                | 1        |       |         |           | 0.936            |
| WrS → ZKE 2 & 4                | 1.003    | 0.013 | 80.107  | < .001*** | 0.942            |
| PoP → EPEP 1 & 4               | 1        |       |         |           | 0.669            |
| PoP → EPEP 2 & 3               | 1.411    | 0.113 | 12.442  | < .001*** | 0.912            |
| Lve → LVE 1 & 2                | 1        |       |         |           | 0.946            |
| Lve → LVE 3 & 4                | 0.962    | 0.011 | 88.501  | < .001*** | 0.950            |
| Cmm → IPPA 15 & 19             | 1        |       |         |           | 0.961            |
| Cmm → IPPA 16 & 24             | 0.978    | 0.010 | 100.705 | < .001*** | 0.953            |
| Cmm → IPPA 13 & 21             | 0.514    | 0.028 | 18.096  | < .001*** | 0.530            |
| Cmm → EPEP 1 & 4               | 0.274    | 0.052 | 5.298   | < .001*** | 0.288            |
| Trs → IPPA 13 & 21             | 1        |       |         |           | 0.460            |
| Trs → IPPA 1 & 4               | 2.154    | 0.145 | 14.889  | < .001*** | 0.978            |
| <b>Regression coefficients</b> |          |       |         |           |                  |
| GSD, WrS                       | 0.952    | 1.030 | 0.924   | 0.356     | 0.506            |
| PoP                            | 0.101    | 0.679 | 0.149   | 0.881     | 0.039            |
| Lve                            | -1.068   | 0.714 | -1.495  | 0.135     | -0.590           |
| Trs                            | -0.091   | 0.437 | -0.208  | 0.836     | -0.024           |
| Cmm                            | 0.372    | 0.189 | 1.970   | 0.049*    | 0.223            |
| GSI, WrS                       | 0.359    | 1.204 | 0.298   | 0.766     | 0.151            |
| PoP                            | 1.038    | 0.792 | 1.311   | 0.190     | 0.313            |
| Lve                            | -0.197   | 0.874 | -0.226  | 0.822     | -0.086           |
| Trs                            | -0.746   | 0.528 | -1.412  | 0.158     | -0.158           |
| Cmm                            | -0.167   | 0.241 | -0.691  | 0.489     | -0.079           |

| Parameters         | Estimate | SE    | z-value | p-value   | Std.<br>estimate |
|--------------------|----------|-------|---------|-----------|------------------|
| <b>Covariances</b> |          |       |         |           |                  |
| GSD, GSI           | 2.126    | 0.103 | 20.636  | < .001*** | 0.775            |
| WrS, PoP           | 0.445    | 0.037 | 12.019  | < .001*** | 0.970            |
| Lve                | 0.664    | 0.021 | 31.486  | < .001*** | 0.996            |
| Cmm                | 0.632    | 0.021 | 30.702  | < .001*** | 0.876            |
| Trs                | 0.294    | 0.022 | 13.457  | < .001*** | 0.912            |
| PoP, Lve           | 0.435    | 0.036 | 12.059  | < .001*** | 0.910            |
| Cmm                | 0.469    | 0.041 | 11.387  | < .001*** | 0.907            |
| Trs                | 0.195    | 0.021 | 9.106   | < .001*** | 0.845            |
| Love, Cmm          | 0.635    | 0.021 | 30.575  | < .001*** | 0.847            |
| Trs                | 0.309    | 0.023 | 13.516  | < .001*** | 0.921            |
| Cmm, Trs           | 0.312    | 0.023 | 13.390  | < .001*** | 0.859            |
| <b>Variances</b>   |          |       |         |           |                  |
| GSD                | 2.176    | 0.115 | 18.970  | < .001*** | 0.959            |
| GSI                | 3.457    | 0.155 | 22.319  | < .001*** | 0.959            |
| WrS                | 0.640    | 0.022 | 29.388  | < .001*** | 1                |
| PoP                | 0.329    | 0.052 | 6.320   | < .001*** | 1                |
| Lve                | 0.693    | 0.023 | 29.623  | < .001*** | 1                |
| Cmm                | 0.812    | 0.025 | 33.002  | < .001*** | 1                |
| Trs                | 0.162    | 0.021 | 7.775   | < .001*** | 1                |
| IWAH 1 & 4         | 0.778    | 0.059 | 13.237  | < .001*** | 0.256            |
| IWAH 2 & 3         | 0.765    | 0.068 | 11.227  | < .001*** | 0.211            |
| IWAH 6 & 7         | 0.721    | 0.075 | 9.574   | < .001*** | 0.167            |
| IWAH 8 & 9         | 1.123    | 0.086 | 13.088  | < .001*** | 0.233            |
| ZKE 1 & 3          | 0.090    | 0.005 | 17.304  | < .001*** | 0.124            |
| ZKE 2 & 4          | 0.081    | 0.005 | 16.812  | < .001*** | 0.112            |
| EPEP 1 & 4         | 0.088    | 0.005 | 16.854  | < .001*** | 0.119            |
| EPEP 2 & 3         | 0.132    | 0.010 | 12.902  | < .001*** | 0.168            |
| LVE 1 & 2          | 0.082    | 0.006 | 14.576  | < .001*** | 0.106            |
| LVE 3 & 4          | 0.069    | 0.007 | 10.085  | < .001*** | 0.097            |
| IPPA 15 & 19       | 0.067    | 0.006 | 11.335  | < .001*** | 0.076            |
| IPPA 16 & 24       | 0.079    | 0.006 | 13.559  | < .001*** | 0.092            |
| IPPA 13 & 21       | 0.068    | 0.004 | 15.903  | < .001*** | 0.088            |
| IPPA 1 & 4         | 0.034    | 0.011 | 3.221   | .001**    | 0.044            |

| Parameters                                                    | Estimate | <i>SE</i> | <i>z</i> -value | <i>p</i> -value | Std. estimate |
|---------------------------------------------------------------|----------|-----------|-----------------|-----------------|---------------|
| R <sup>2</sup> (Coefficient of determination / Reliabilities) |          |           |                 |                 |               |
| GSD                                                           | 0.041    |           |                 |                 |               |
| GSI                                                           | 0.041    |           |                 |                 |               |
| IWAH 1 & 4                                                    | 0.744    |           |                 |                 |               |
| IWAH 2 & 3                                                    | 0.789    |           |                 |                 |               |
| IWAH 6 & 7                                                    | 0.833    |           |                 |                 |               |
| IWAH 8 & 9                                                    | 0.767    |           |                 |                 |               |
| ZKE 1 & 3                                                     | 0.876    |           |                 |                 |               |
| ZKE 2 & 4                                                     | 0.888    |           |                 |                 |               |
| EPEP 1 & 4                                                    | 0.881    |           |                 |                 |               |
| EPEP 2 & 3                                                    | 0.832    |           |                 |                 |               |
| LVE 1 & 2                                                     | 0.894    |           |                 |                 |               |
| LVE 3 & 4                                                     | 0.903    |           |                 |                 |               |
| IPPA 15 & 19                                                  | 0.924    |           |                 |                 |               |
| IPPA 16 & 24                                                  | 0.908    |           |                 |                 |               |
| IPPA 13 & 21                                                  | 0.912    |           |                 |                 |               |
| IPPA 1 & 4                                                    | 0.956    |           |                 |                 |               |

*Notes.* *N* = 1517. *SE* = Standard error, Std. estimate = Standardized estimate (estimate in the fully standardized model). GSD = Global self-definition, GSI = Global self-investment, WrS = Warmth / Support, PoP = Positive parenting, Lve = Love, Trs = Trust, Cmm = Communication. The following abbreviations were used for the questionnaires: ZKE = „Zürcher Kurzfragebogen zum Erziehungsverhalten”, EPEP = “Evaluation des Pratiques Educatives Parentales”, LVE = items measuring parental love, IPPA = “Inventory of Parent and Peer Attachment”, IWAH = “Identification With All Humanity scale”. \**p* < .05. \*\**p* < .01. \*\*\**p* < .001.

**Table S11***Estimated Parameters of the Positive Regression Model in the English Sample*

| Parameters                     | Estimate | SE    | z-value | p-value   | Std. estimate |
|--------------------------------|----------|-------|---------|-----------|---------------|
| <b>Factor loadings</b>         |          |       |         |           |               |
| GSD → IWAH 1 & 4               | 1        |       |         |           | 0.798         |
| GSD → IWAH 2 & 3               | 1.150    | 0.041 | 27.789  | < .001*** | 0.865         |
| GSI → IWAH 6 & 7               | 1        |       |         |           | 0.893         |
| GSI → IWAH 8 & 9               | 1.039    | 0.027 | 38.347  | < .001*** | 0.900         |
| WrS → ZKE 1 & 3                | 1        |       |         |           | 0.923         |
| WrS → ZKE 2 & 4                | 1.012    | 0.013 | 79.899  | < .001*** | 0.940         |
| PoP → EPEP 1 & 4               | 1        |       |         |           | 0.651         |
| PoP → EPEP 2 & 3               | 1.492    | 0.094 | 15.948  | < .001*** | 0.938         |
| Lve → LVE 1 & 2                | 1        |       |         |           | 0.919         |
| Lve → LVE 3 & 4                | 0.928    | 0.014 | 64.525  | < .001*** | 0.936         |
| Cmm → IPPA 15 & 19             | 1        |       |         |           | 0.965         |
| Cmm → IPPA 16 & 24             | 0.975    | 0.010 | 98.082  | < .001*** | 0.954         |
| Cmm → IPPA 13 & 21             | 0.493    | 0.030 | 16.327  | < .001*** | 0.515         |
| Cmm → EPEP 1 & 4               | 0.281    | 0.038 | 7.400   | < .001*** | 0.297         |
| Trs → IPPA 13 & 21             | 1        |       |         |           | 0.469         |
| Trs → IPPA 1 & 4               | 2.044    | 0.147 | 13.937  | < .001*** | 0.968         |
| <b>Regression coefficients</b> |          |       |         |           |               |
| GSD, WrS                       | -0.063   | 0.631 | -0.099  | 0.921     | -0.034        |
| PoP                            | 1.405    | 0.508 | 2.766   | 0.006**   | 0.547         |
| Lve                            | -1.014   | 0.524 | -1.937  | 0.053     | -0.552        |
| Trs                            | 0.345    | 0.396 | 0.870   | 0.384     | 0.098         |
| Cmm                            | 0.179    | 0.167 | 1.071   | 0.284     | 0.113         |
| GSI, WrS                       | -0.391   | 0.833 | -0.469  | 0.639     | -0.157        |
| PoP                            | 1.903    | 0.685 | 2.781   | 0.005**   | 0.547         |
| Lve                            | -0.029   | 0.698 | -0.041  | 0.967     | -0.012        |
| Trs                            | -0.153   | 0.537 | -0.284  | 0.776     | -0.032        |
| Cmm                            | -0.399   | 0.220 | -1.817  | 0.069     | -0.186        |

| Parameters         | Estimate | SE    | z-value | p-value   | Std.<br>estimate |
|--------------------|----------|-------|---------|-----------|------------------|
| <b>Covariances</b> |          |       |         |           |                  |
| GSD, GSI           | 1.787    | 0.097 | 18.388  | < .001*** | 0.693            |
| WrS, PoP           | 0.418    | 0.028 | 14.864  | < .001*** | 0.971            |
| Lve                | 0.608    | 0.021 | 28.904  | < .001*** | 1.011            |
| Cmm                | 0.616    | 0.020 | 30.745  | < .001*** | 0.881            |
| Trs                | 0.284    | 0.022 | 12.628  | < .001*** | 0.904            |
| PoP, Lve           | 0.400    | 0.027 | 14.886  | < .001*** | 0.933            |
| Cmm                | 0.439    | 0.031 | 14.309  | < .001*** | 0.881            |
| Trs                | 0.188    | 0.018 | 10.412  | < .001*** | 0.838            |
| Love, Cmm          | 0.587    | 0.020 | 29.534  | < .001*** | 0.843            |
| Trs                | 0.285    | 0.022 | 12.688  | < .001*** | 0.911            |
| Cmm, Trs           | 0.310    | 0.024 | 13.072  | < .001*** | 0.851            |
| <b>Variances</b>   |          |       |         |           |                  |
| GSD                | 1.886    | 0.117 | 16.160  | < .001*** | 0.933            |
| GSI                | 3.524    | 0.168 | 20.962  | < .001*** | 0.949            |
| WrS                | 0.603    | 0.022 | 27.970  | < .001*** | 1                |
| PoP                | 0.618    | 0.021 | 29.912  | < .001*** | 1                |
| Lve                | 0.600    | 0.024 | 25.410  | < .001*** | 1                |
| Cmm                | 0.810    | 0.023 | 34.512  | < .001*** | 1                |
| Trs                | 0.164    | 0.022 | 7.376   | < .001*** | 1                |
| IWAH 1 & 4         | 1.156    | 0.076 | 15.143  | < .001*** | 0.364            |
| IWAH 2 & 3         | 0.904    | 0.097 | 9.307   | < .001*** | 0.253            |
| IWAH 6 & 7         | 0.944    | 0.097 | 9.782   | < .001*** | 0.203            |
| IWAH 8 & 9         | 0.940    | 0.097 | 9.730   | < .001*** | 0.190            |
| ZKE 1 & 3          | 0.105    | 0.006 | 18.450  | < .001*** | 0.148            |
| ZKE 2 & 4          | 0.082    | 0.005 | 17.258  | < .001*** | 0.117            |
| EPEP 1 & 4         | 0.107    | 0.006 | 18.947  | < .001*** | 0.147            |
| EPEP 2 & 3         | 0.093    | 0.009 | 9.811   | < .001*** | 0.119            |
| LVE 1 & 2          | 0.110    | 0.006 | 17.849  | < .001*** | 0.156            |
| LVE 3 & 4          | 0.073    | 0.005 | 15.576  | < .001*** | 0.123            |
| IPPA 15 & 19       | 0.060    | 0.006 | 9.948   | < .001*** | 0.069            |
| IPPA 16 & 24       | 0.076    | 0.006 | 13.107  | < .001*** | 0.090            |
| IPPA 13 & 21       | 0.077    | 0.005 | 16.975  | < .001*** | 0.104            |
| IPPA 1 & 4         | 0.046    | 0.011 | 4.197   | < .001*** | 0.063            |



| Parameters                                                    | Estimate | <i>SE</i> | <i>z</i> -value | <i>p</i> -value | Std. estimate |
|---------------------------------------------------------------|----------|-----------|-----------------|-----------------|---------------|
| R <sup>2</sup> (Coefficient of determination / Reliabilities) |          |           |                 |                 |               |
| GSD                                                           | 0.067    |           |                 |                 |               |
| GSI                                                           | 0.051    |           |                 |                 |               |
| IWAH 1 & 4                                                    | 0.636    |           |                 |                 |               |
| IWAH 2 & 3                                                    | 0.747    |           |                 |                 |               |
| IWAH 6 & 7                                                    | 0.797    |           |                 |                 |               |
| IWAH 8 & 9                                                    | 0.810    |           |                 |                 |               |
| ZKE 1 & 3                                                     | 0.852    |           |                 |                 |               |
| ZKE 2 & 4                                                     | 0.883    |           |                 |                 |               |
| EPEP 1 & 4                                                    | 0.853    |           |                 |                 |               |
| EPEP 2 & 3                                                    | 0.881    |           |                 |                 |               |
| LVE 1 & 2                                                     | 0.844    |           |                 |                 |               |
| LVE 3 & 4                                                     | 0.877    |           |                 |                 |               |
| IPPA 15 & 19                                                  | 0.931    |           |                 |                 |               |
| IPPA 16 & 24                                                  | 0.910    |           |                 |                 |               |
| IPPA 13 & 21                                                  | 0.896    |           |                 |                 |               |
| IPPA 1 & 4                                                    | 0.937    |           |                 |                 |               |

*Notes.* *N* = 1539. *SE* = Standard error, Std. estimate = Standardized estimate (estimate in the fully standardized model). GSD = Global self-definition, GSI = Global self-investment, WrS = Warmth / Support, PoP = Positive parenting, Lve = Love, Trs = Trust, Cmm = Communication. The following abbreviations were used for the questionnaires: ZKE = „Zürcher Kurzfragebogen zum Erziehungsverhalten”, EPEP = “Evaluation des Pratiques Educatives Parentales”, LVE = items measuring parental love, IPPA = “Inventory of Parent and Peer Attachment”, IWAH = “Identification With All Humanity scale”. \**p* < .05. \*\**p* < .01. \*\*\**p* < .001.

**Table S12***Estimated Parameters of the Negative Regression Model in the English Sample*

| Parameters                     | Estimate | SE    | z-value | p-value   | Std.<br>estimate |
|--------------------------------|----------|-------|---------|-----------|------------------|
| <b>Factor loadings</b>         |          |       |         |           |                  |
| GSD → IWAH 1 & 4               | 1        |       |         |           | 0.790            |
| GSD → IWAH 2 & 3               | 1.173    | 0.042 | 28.170  | < .001*** | 0.873            |
| GSI → IWAH 6 & 7               | 1        |       |         |           | 0.891            |
| GSI → IWAH 8 & 9               | 1.042    | 0.027 | 38.017  | < .001*** | 0.901            |
| Ind → MOPS 5 & 13              | 1        |       |         |           | 0.943            |
| Ind → MOPS 12 & 8              | 0.968    | 0.018 | 53.174  | < .001*** | 0.964            |
| Abs → MOPS 2 & 14              | 1        |       |         |           | 0.924            |
| Abs → MOPS 15 & 7              | 1.052    | 0.024 | 43.709  | < .001*** | 0.934            |
| Ovr → MOPS 1 & 4               | 1        |       |         |           | 0.676            |
| Ovr → MOPS 3 & 6               | 1.621    | 0.093 | 17.369  | < .001*** | 0.938            |
| <b>Regression coefficients</b> |          |       |         |           |                  |
| GSD, Ind                       | -0.526   | 0.138 | -3.825  | < .001*** | -0.249           |
| Abs                            | 0.756    | 0.213 | 3.550   | < .001*** | 0.298            |
| Ovr                            | 0.293    | 0.192 | 1.527   | 0.127     | 0.085            |
| GSI, Ind                       | -0.854   | 0.178 | -4.803  | < .001*** | -0.296           |
| Abs                            | 0.735    | 0.271 | 2.709   | 0.007**   | 0.212            |
| Ovr                            | 0.557    | 0.252 | 2.210   | 0.027*    | 0.119            |
| <b>Covariances</b>             |          |       |         |           |                  |
| GSD, GSI                       | 1.779    | 0.092 | 19.415  | < .001*** | 0.683            |
| Ind, Abs                       | 0.312    | 0.022 | 14.445  | < .001*** | 0.844            |
| Ovr                            | 0.177    | 0.014 | 12.975  | < .001*** | 0.648            |
| Abs, Ovr                       | 0.174    | 0.015 | 11.445  | < .001*** | 0.761            |
| <b>Variances</b>               |          |       |         |           |                  |
| GSD                            | 1.895    | 0.114 | 16.582  | < .001*** | 0.956            |
| GSI                            | 3.577    | 0.167 | 21.408  | < .001*** | 0.966            |
| Ind                            | 0.444    | 0.026 | 17.215  | < .001*** | 1                |
| Abs                            | 0.309    | 0.024 | 12.968  | < .001*** | 1                |
| Ovr                            | 0.168    | 0.016 | 10.419  | < .001*** | 1                |
| IWAH 1 & 4                     | 1.195    | 0.076 | 15.753  | < .001*** | 0.376            |
| IWAH 2 & 3                     | 0.851    | 0.096 | 8.879   | < .001*** | 0.238            |

| Parameters                                                          | Estimate | SE    | z-value | p-value   | Std. estimate |
|---------------------------------------------------------------------|----------|-------|---------|-----------|---------------|
| <b>Variiances</b>                                                   |          |       |         |           |               |
| IWAH 6 & 7                                                          | 0.956    | 0.097 | 9.830   | < .001*** | 0.205         |
| IWAH 8 & 9                                                          | 0.927    | 0.098 | 9.438   | < .001*** | 0.187         |
| MOPS 5 & 13                                                         | 0.056    | 0.006 | 8.769   | < .001*** | 0.112         |
| MOPS 12 & 8                                                         | 0.032    | 0.006 | 5.448   | < .001*** | 0.070         |
| MOPS 2 & 14                                                         | 0.053    | 0.005 | 10.086  | < .001*** | 0.146         |
| MOPS 15 & 7                                                         | 0.050    | 0.006 | 7.974   | < .001*** | 0.127         |
| MOPS 1 & 4                                                          | 0.200    | 0.009 | 21.984  | < .001*** | 0.543         |
| MOPS 3 & 6                                                          | 0.061    | 0.018 | 3.406   | .001**    | 0.121         |
| <b>R<sup>2</sup> (Coefficient of determination / Reliabilities)</b> |          |       |         |           |               |
| GSD                                                                 | 0.044    |       |         |           |               |
| GSI                                                                 | 0.034    |       |         |           |               |
| IWAH 1 & 4                                                          | 0.624    |       |         |           |               |
| IWAH 2 & 3                                                          | 0.762    |       |         |           |               |
| IWAH 6 & 7                                                          | 0.795    |       |         |           |               |
| IWAH 8 & 9                                                          | 0.813    |       |         |           |               |
| MOPS 5 & 13                                                         | 0.888    |       |         |           |               |
| MOPS 12 & 8                                                         | 0.930    |       |         |           |               |
| MOPS 2 & 14                                                         | 0.854    |       |         |           |               |
| MOPS 15 & 7                                                         | 0.873    |       |         |           |               |
| MOPS 1 & 4                                                          | 0.457    |       |         |           |               |
| MOPS 3 & 6                                                          | 0.879    |       |         |           |               |

*Notes.*  $N = 1539$ . *SE* = Standard error, Std. estimate = Standardized estimate (estimate in the fully standardized model). GSD = Global self-definition, GSI = Global self-investment, Ind = Indifference, Abs = Abuse, Ovr = Over-control. The following abbreviations were used for the two different questionnaires: MOPS = “Measure of Parental Style”, IWAH = “Identification With All Humanity scale”. \* $p < .05$ . \*\* $p < .01$ . \*\*\* $p < .001$ .

**Table S13***Estimated Parameters of the Combined Regression Model in the German Sample*

| Parameters                     | Estimate | SE    | z-value | p-value   | Std.<br>estimate |
|--------------------------------|----------|-------|---------|-----------|------------------|
| <b>Factor loadings</b>         |          |       |         |           |                  |
| GSD → IWAH 1 & 4               | 1        |       |         |           | 0.862            |
| GSD → IWAH 2 & 3               | 1.122    | 0.029 | 39.100  | < .001*** | 0.888            |
| GSI → IWAH 6 & 7               | 1        |       |         |           | 0.912            |
| GSI → IWAH 8 & 9               | 1.014    | 0.024 | 42.770  | < .001*** | 0.876            |
| WrS → ZKE 1 & 3                | 1        |       |         |           | 0.937            |
| WrS → ZKE 2 & 4                | 1.002    | 0.013 | 79.914  | < .001*** | 0.942            |
| PoP → EPEP 1 & 4               | 1        |       |         |           | 0.674            |
| PoP → EPEP 2 & 3               | 1.399    | 0.111 | 12.583  | < .001*** | 0.912            |
| Lve → LVE 1 & 2                | 1        |       |         |           | 0.946            |
| Lve → LVE 3 & 4                | 0.962    | 0.011 | 88.539  | < .001*** | 0.950            |
| Cmm → IPPA 15 & 19             | 1        |       |         |           | 0.962            |
| Cmm → IPPA 16 & 24             | 0.977    | 0.010 | 100.955 | < .001*** | 0.952            |
| Cmm → IPPA 13 & 21             | 0.496    | 0.026 | 18.759  | < .001*** | 0.511            |
| Cmm → EPEP 1 & 4               | 0.269    | 0.052 | 5.212   | < .001*** | 0.183            |
| Trs → IPPA 13 & 21             | 1        |       |         |           | 0.479            |
| Trs → IPPA 1 & 4               | 2.057    | 0.120 | 17.083  | < .001*** | 0.972            |
| Ind → MOPS 5 & 13              | 1        |       |         |           | 0.870            |
| Ind → MOPS 12 & 8              | 1.154    | 0.028 | 40.721  | < .001*** | 0.917            |
| Abs → MOPS 2 & 14              | 1        |       |         |           | 0.904            |
| Abs → MOPS 15 & 7              | 1.049    | 0.024 | 43.773  | < .001*** | 0.890            |
| Ovr → MOPS 1 & 4               | 1        |       |         |           | 0.609            |
| Ovr → MOPS 3 & 6               | 1.652    | 0.091 | 18.136  | < .001*** | 0.849            |
| <b>Regression coefficients</b> |          |       |         |           |                  |
| GSD, WrS                       | 1.111    | 1.035 | 1.073   | 0.283     | 0.590            |
| PoP                            | -0.164   | 0.685 | -0.239  | 0.811     | -0.063           |
| Lve                            | -0.950   | 0.791 | -1.201  | 0.230     | -0.525           |
| Trs                            | 0.141    | 0.742 | 0.190   | 0.849     | 0.039            |
| Cmm                            | 0.370    | 0.218 | 1.699   | 0.089     | 0.222            |
| Ind                            | -0.304   | 0.396 | -0.768  | 0.443     | -0.124           |
| Abs                            | 0.984    | 0.995 | 0.989   | 0.323     | 0.409            |
| Ovr                            | -0.626   | 1.307 | -0.479  | 0.632     | -0.146           |

| Parameters              | Estimate | <i>SE</i> | <i>z</i> -value | <i>p</i> -value | Std.<br>estimate |
|-------------------------|----------|-----------|-----------------|-----------------|------------------|
| Regression coefficients |          |           |                 |                 |                  |
| GSI, WrS                | 0.873    | 1.353     | 0.646           | 0.518           | 0.368            |
| PoP                     | 0.527    | 0.915     | 0.576           | 0.565           | 0.160            |
| Lve                     | 0.311    | 1.072     | 0.290           | 0.772           | 0.136            |
| Trs                     | -1.739   | 1.205     | -1.444          | 0.149           | -0.384           |
| Cmm                     | 0.038    | 0.325     | 0.116           | 0.908           | 0.018            |
| Ind                     | -0.913   | 0.675     | -1.351          | 0.177           | -0.294           |
| Abs                     | 3.276    | 1.830     | 1.790           | 0.073           | 1.080            |
| Ovr                     | -3.778   | 2.403     | -1.572          | 0.116           | -0.700           |
| Covariances             |          |           |                 |                 |                  |
| GSD, GSI                | 2.062    | 0.116     | 17.830          | < .001***       | 0.780            |
| WrS, PoP                | 0.448    | 0.037     | 12.152          | < .001***       | 0.970            |
| Lve                     | 0.664    | 0.021     | 31.578          | < .001***       | 0.996            |
| Cmm                     | 0.631    | 0.021     | 30.729          | < .001***       | 0.875            |
| Trs                     | 0.307    | 0.020     | 15.062          | < .001***       | 0.916            |
| Ind                     | -0.362   | 0.018     | -19.740         | < .001***       | -0.740           |
| Abs                     | -0.324   | 0.018     | -18.342         | < .001***       | -0.648           |
| Ovr                     | -0.126   | 0.009     | -13.681         | < .001***       | -0.450           |
| PoP, Lve                | 0.438    | 0.036     | 12.193          | < .001***       | 0.910            |
| Cmm                     | 0.472    | 0.041     | 11.492          | < .001***       | 0.907            |
| Trs                     | 0.206    | 0.021     | 9.747           | < .001***       | 0.851            |
| Ind                     | -0.223   | 0.020     | -11.144         | < .001***       | -0.633           |
| Abs                     | -0.197   | 0.019     | -10.484         | < .001***       | -0.544           |
| Ovr                     | -0.071   | 0.008     | -8.461          | < .001***       | -0.352           |
| Love, Cmm               | 0.634    | 0.021     | 30.626          | < .001***       | 0.845            |
| Trs                     | 0.323    | 0.021     | 15.179          | < .001***       | 0.926            |
| Ind                     | -0.396   | 0.019     | -20.765         | < .001***       | -0.778           |
| Abs                     | -0.360   | 0.019     | -18.965         | < .001***       | -0.692           |
| Ovr                     | -0.145   | 0.010     | -14.808         | < .001***       | -0.495           |
| Cmm, Trs                | 0.327    | 0.022     | 14.935          | < .001***       | 0.864            |
| Ind                     | -0.327   | 0.017     | -18.988         | < .001***       | -0.593           |
| Abs                     | -0.302   | 0.018     | -17.160         | < .001***       | -0.536           |
| Ovr                     | -0.119   | 0.010     | -11.852         | < .001***       | -0.377           |

| Parameters   | Estimate | SE    | z-value | p-value   | Std.<br>estimate |
|--------------|----------|-------|---------|-----------|------------------|
| Covariances  |          |       |         |           |                  |
| Trs, Ind     | -0.188   | 0.014 | -13.415 | < .001*** | -0.733           |
| Abs          | -0.186   | 0.014 | -13.248 | < .001*** | -0.709           |
| Ovr          | -0.088   | 0.007 | -12.262 | < .001*** | -0.597           |
| Ind, Abs     | 0.340    | 0.019 | 17.881  | < .001*** | 0.889            |
| Ovr          | 0.154    | 0.012 | 13.240  | < .001*** | 0.717            |
| Abs, Ovr     | 0.202    | 0.014 | 14.238  | < .001*** | 0.917            |
| Variances    |          |       |         |           |                  |
| GSD          | 2.137    | 0.115 | 18.640  | < .001*** | 0.943            |
| GSI          | 3.269    | 0.202 | 16.175  | < .001*** | 0.908            |
| WrS          | 0.640    | 0.022 | 29.414  | < .001*** | 1.000            |
| PoP          | 0.333    | 0.052 | 6.386   | < .001*** | 1.000            |
| Lve          | 0.693    | 0.023 | 29.707  | < .001*** | 1.000            |
| Cmm          | 0.812    | 0.025 | 33.083  | < .001*** | 1.000            |
| Trs          | 0.176    | 0.020 | 8.694   | < .001*** | 1.000            |
| Ind          | 0.375    | 0.022 | 17.070  | < .001*** | 1.000            |
| Abs          | 0.391    | 0.022 | 17.448  | < .001*** | 1.000            |
| Ovr          | 0.124    | 0.013 | 9.710   | < .001*** | 1.000            |
| IWAH 1 & 4   | 0.781    | 0.059 | 13.234  | < .001*** | 0.256            |
| IWAH 2 & 3   | 0.762    | 0.068 | 11.207  | < .001*** | 0.211            |
| IWAH 6 & 7   | 0.725    | 0.075 | 9.651   | < .001*** | 0.168            |
| IWAH 8 & 9   | 1.119    | 0.086 | 13.055  | < .001*** | 0.232            |
| ZKE 1 & 3    | 0.089    | 0.005 | 17.105  | < .001*** | 0.123            |
| ZKE 2 & 4    | 0.082    | 0.005 | 16.891  | < .001*** | 0.113            |
| EPEP 1 & 4   | 0.087    | 0.005 | 16.878  | < .001*** | 0.119            |
| EPEP 2 & 3   | 0.133    | 0.010 | 13.120  | < .001*** | 0.169            |
| LVE 1 & 2    | 0.081    | 0.006 | 14.315  | < .001*** | 0.105            |
| LVE 3 & 4    | 0.069    | 0.006 | 10.728  | < .001*** | 0.097            |
| IPPA 15 & 19 | 0.066    | 0.006 | 11.324  | < .001*** | 0.075            |
| IPPA 16 & 24 | 0.080    | 0.006 | 13.717  | < .001*** | 0.093            |
| IPPA 13 & 21 | 0.066    | 0.004 | 16.235  | < .001*** | 0.086            |
| IPPA 1 & 4   | 0.043    | 0.008 | 5.283   | < .001*** | 0.055            |
| MOPS 5 & 13  | 0.121    | 0.008 | 14.901  | < .001*** | 0.244            |
| MOPS 12 & 8  | 0.095    | 0.009 | 10.076  | < .001*** | 0.160            |

| Parameters                                                    | Estimate | <i>SE</i> | <i>z</i> -value | <i>p</i> -value | Std. estimate |
|---------------------------------------------------------------|----------|-----------|-----------------|-----------------|---------------|
| MOPS 2 & 14                                                   | 0.087    | 0.007     | 12.556          | < .001***       | 0.183         |
| MOPS 15 & 7                                                   | 0.114    | 0.008     | 13.523          | < .001***       | 0.208         |
| MOPS 1 & 4                                                    | 0.210    | 0.010     | 21.211          | < .001***       | 0.629         |
| MOPS 3 & 6                                                    | 0.131    | 0.014     | 9.447           | < .001***       | 0.279         |
| <hr/>                                                         |          |           |                 |                 |               |
| R <sup>2</sup> (Coefficient of determination / Reliabilities) |          |           |                 |                 |               |
| GSD                                                           | 0.057    |           |                 |                 |               |
| GSI                                                           | 0.092    |           |                 |                 |               |
| IWAH 1 & 4                                                    | 0.744    |           |                 |                 |               |
| IWAH 2 & 3                                                    | 0.789    |           |                 |                 |               |
| IWAH 6 & 7                                                    | 0.832    |           |                 |                 |               |
| IWAH 8 & 9                                                    | 0.768    |           |                 |                 |               |
| ZKE 1 & 3                                                     | 0.877    |           |                 |                 |               |
| ZKE 2 & 4                                                     | 0.887    |           |                 |                 |               |
| EPEP 1 & 4                                                    | 0.881    |           |                 |                 |               |
| EPEP 2 & 3                                                    | 0.831    |           |                 |                 |               |
| LVE 1 & 2                                                     | 0.895    |           |                 |                 |               |
| LVE 3 & 4                                                     | 0.903    |           |                 |                 |               |
| IPPA 15 & 19                                                  | 0.925    |           |                 |                 |               |
| IPPA 16 & 24                                                  | 0.907    |           |                 |                 |               |
| IPPA 13 & 21                                                  | 0.914    |           |                 |                 |               |
| IPPA 1 & 4                                                    | 0.945    |           |                 |                 |               |
| MOPS 5 & 13                                                   | 0.756    |           |                 |                 |               |
| MOPS 12 & 8                                                   | 0.840    |           |                 |                 |               |
| MOPS 2 & 14                                                   | 0.817    |           |                 |                 |               |
| MOPS 15 & 7                                                   | 0.792    |           |                 |                 |               |
| MOPS 1 & 4                                                    | 0.371    |           |                 |                 |               |
| MOPS 3 & 6                                                    | 0.721    |           |                 |                 |               |

*Notes.* *N* = 1517. *SE* = Standard error, Std. estimate = Standardized estimate (estimate in the fully standardized model). GSD = Global self-definition, GSI = Global self-investment, WrS = Warmth / Support, PoP = Positive parenting, Lve = Love, Trs = Trust, Cmm = Communication, Ind = Indifference, Abs = Abuse, Ovr = Over-control. The following abbreviations were used for the questionnaires: ZKE = „Zürcher Kurzfragebogen zum Erziehungsverhalten“, EPEP = “Evaluation des Pratiques Educatives Parentales”, LVE = items measuring parental love, IPPA = “Inventory of Parent and Peer Attachment”, IWAH = “Identification With All Humanity scale”.

\**p* < .05. \*\**p* < .01. \*\*\*. *p* < .001.

**Table S14***Estimated Parameters of the Combined Regression Model in the English Sample*

| Parameters                     | Estimate | SE    | z-value | p-value   | Std. estimate |
|--------------------------------|----------|-------|---------|-----------|---------------|
| <b>Factor loadings</b>         |          |       |         |           |               |
| GSD → IWAH 1 & 4               | 1        |       |         |           | 0.802         |
| GSD → IWAH 2 & 3               | 1.138    | 0.041 | 27.994  | < .001*** | 0.860         |
| GSI → IWAH 6 & 7               | 1        |       |         |           | 0.893         |
| GSI → IWAH 8 & 9               | 1.038    | 0.027 | 38.076  | < .001*** | 0.900         |
| WrS → ZKE 1 & 3                | 1        |       |         |           | 0.924         |
| WrS → ZKE 2 & 4                | 1.011    | 0.013 | 79.891  | < .001*** | 0.939         |
| PoP → EPEP 1 & 4               | 1        |       |         |           | 0.665         |
| PoP → EPEP 2 & 3               | 1.458    | 0.091 | 15.950  | < .001*** | 0.936         |
| Lve → LVE 1 & 2                | 1        |       |         |           | 0.921         |
| Lve → LVE 3 & 4                | 0.924    | 0.014 | 65.924  | < .001*** | 0.934         |
| Cmm → IPPA 15 & 19             | 1        |       |         |           | 0.965         |
| Cmm → IPPA 16 & 24             | 0.976    | 0.010 | 97.775  | < .001*** | 0.954         |
| Cmm → IPPA 13 & 21             | 0.483    | 0.027 | 17.994  | < .001*** | 0.505         |
| Cmm → EPEP 1 & 4               | 0.268    | 0.039 | 6.900   | < .001*** | 0.283         |
| Trs → IPPA 13 & 21             | 1        |       |         |           | 0.479         |
| Trs → IPPA 1 & 4               | 1.995    | 0.121 | 16.519  | < .001*** | 0.965         |
| Ind → MOPS 5 & 13              | 1        |       |         |           | 0.948         |
| Ind → MOPS 12 & 8              | 0.958    | 0.017 | 57.814  | < .001*** | 0.959         |
| Abs → MOPS 2 & 14              | 1        |       |         |           | 0.925         |
| Abs → MOPS 15 & 7              | 1.049    | 0.024 | 43.888  | < .001*** | 0.933         |
| Ovr → MOPS 1 & 4               | 1        |       |         |           | 0.654         |
| Ovr → MOPS 3 & 6               | 1.734    | 0.115 | 15.014  | < .001*** | 0.969         |
| <b>Regression coefficients</b> |          |       |         |           |               |
| GSD, WrS                       | 0.047    | 0.596 | 0.079   | 0.937     | 0.026         |
| PoP                            | 1.141    | 0.646 | 1.767   | 0.077     | 0.452         |
| Lve                            | -1.056   | 0.561 | -1.881  | 0.060     | -0.574        |
| Trs                            | 1.000    | 0.476 | 2.102   | 0.036*    | 0.288         |
| Cmm                            | 0.084    | 0.166 | 0.504   | 0.614     | 0.053         |
| Ind                            | -0.441   | 0.199 | -2.220  | 0.026*    | -0.207        |
| Abs                            | 0.588    | 0.212 | 2.774   | 0.006**   | 0.229         |
| Ovr                            | 0.623    | 0.228 | 2.735   | 0.006**   | 0.173         |



| Parameters              | Estimate | SE    | z-value | p-value   | Std. estimate |
|-------------------------|----------|-------|---------|-----------|---------------|
| Regression coefficients |          |       |         |           |               |
| GSI, WrS                | -0.253   | 0.779 | -0.325  | 0.745     | -0.102        |
| PoP                     | 1.708    | 0.867 | 1.969   | 0.049     | 0.501         |
| Lve                     | -0.155   | 0.748 | 0.208   | 0.835     | -0.063        |
| Trs                     | 0.517    | 0.635 | 0.815   | 0.415     | 0.111         |
| Cmm                     | -0.523   | 0.223 | -2.345  | 0.019     | -0.244        |
| Ind                     | -0.554   | 0.271 | -2.041  | 0.041     | -0.193        |
| Abs                     | 0.746    | 0.272 | 2.746   | 0.006     | 0.215         |
| Ovr                     | 0.550    | 0.280 | 1.964   | 0.050     | 0.113         |
| Covariances             |          |       |         |           |               |
| GSD, GSI                | 1.696    | 0.094 | 18.037  | < .001*** | 0.682         |
| WrS, PoP                | 0.428    | 0.029 | 14.924  | < .001*** | 0.972         |
| Lve                     | 0.612    | 0.021 | 29.173  | < .001*** | 1.012         |
| Cmm                     | 0.616    | 0.020 | 30.776  | < .001*** | 0.880         |
| Trs                     | 0.291    | 0.020 | 14.522  | < .001*** | 0.907         |
| Ind                     | -0.330   | 0.020 | -16.677 | < .001*** | -0.632        |
| Abs                     | -0.218   | 0.017 | -12.986 | < .001*** | -0.502        |
| Ovr                     | -0.142   | 0.009 | -15.509 | < .001*** | -0.458        |
| PoP, Lve                | 0.411    | 0.027 | 14.961  | < .001*** | 0.934         |
| Cmm                     | 0.449    | 0.031 | 14.303  | < .001*** | 0.883         |
| Trs                     | 0.197    | 0.017 | 11.334  | < .001*** | 0.842         |
| Ind                     | -0.189   | 0.016 | 11.493  | < .001*** | -0.498        |
| Abs                     | -0.121   | 0.013 | -9.504  | < .001*** | -0.386        |
| Ovr                     | -0.082   | 0.008 | -10.508 | < .001*** | -0.364        |
| Love, Cmm               | 0.588    | 0.020 | 29.631  | < .001*** | 0.841         |
| Trs                     | 0.293    | 0.020 | 14.541  | < .001*** | 0.913         |
| Ind                     | -0.364   | 0.021 | -17.170 | < .001*** | -0.699        |
| Abs                     | -0.246   | 0.018 | -13.612 | < .001*** | -0.568        |
| Ovr                     | -0.155   | 0.009 | -16.452 | < .001*** | -0.503        |
| Cmm, Trs                | 0.317    | 0.021 | 15.007  | < .001*** | 0.853         |
| Ind                     | -0.272   | 0.019 | 14.424  | < .001*** | -0.451        |
| Abs                     | -0.169   | 0.016 | -10.534 | < .001*** | -0.339        |
| Ovr                     | -0.140   | 0.010 | -14.399 | < .001*** | -0.393        |

| Parameters   | Estimate | SE    | z-value | p-value   | Std.<br>estimate |
|--------------|----------|-------|---------|-----------|------------------|
| Covariances  |          |       |         |           |                  |
| Trs, Ind     | -0.168   | 0.014 | -12.255 | < .001*** | -0.608           |
| Abs          | -0.118   | 0.011 | -10.750 | < .001*** | -0.516           |
| Ovr          | -0.094   | 0.008 | -12.260 | < .001*** | -0.577           |
| Ind, Abs     | 0.315    | 0.022 | 14.547  | < .001*** | 0.844            |
| Ovr          | 0.170    | 0.014 | 11.959  | < .001*** | 0.638            |
| Abs, Ovr     | 0.163    | 0.016 | 10.351  | < .001*** | 0.739            |
| Variances    |          |       |         |           |                  |
| GSD          | 1.810    | 0.111 | 16.253  | < .001*** | 0.886            |
| GSI          | 3.415    | 0.165 | 20.719  | < .001*** | 0.919            |
| WrS          | 0.606    | 0.022 | 28.064  | < .001*** | 1.000            |
| PoP          | 0.320    | 0.039 | 8.304   | < .001*** | 1.000            |
| Lve          | 0.604    | 0.024 | 25.719  | < .001*** | 1.000            |
| Cmm          | 0.808    | 0.023 | 34.482  | < .001*** | 1.000            |
| Trs          | 0.170    | 0.020 | 8.509   | < .001*** | 1.000            |
| Ind          | 0.450    | 0.026 | 17.444  | < .001*** | 1.000            |
| Abs          | 0.309    | 0.024 | 13.010  | < .001*** | 1.000            |
| Ovr          | 0.157    | 0.016 | 9.580   | < .001*** | 1.000            |
| IWAH 1 & 4   | 1.133    | 0.076 | 14.980  | < .001*** | 0.357            |
| IWAH 2 & 3   | 0.934    | 0.095 | 9.846   | < .001*** | 0.261            |
| IWAH 6 & 7   | 0.941    | 0.097 | 9.684   | < .001*** | 0.202            |
| IWAH 8 & 9   | 0.943    | 0.097 | 9.691   | < .001*** | 0.191            |
| ZKE 1 & 3    | 0.104    | 0.006 | 18.296  | < .001*** | 0.147            |
| ZKE 2 & 4    | 0.083    | 0.005 | 17.338  | < .001*** | 0.118            |
| EPEP 1 & 4   | 0.105    | 0.006 | 18.666  | < .001*** | 0.145            |
| EPEP 2 & 3   | 0.096    | 0.009 | 10.475  | < .001*** | 0.124            |
| LVE 1 & 2    | 0.108    | 0.006 | 17.860  | < .001*** | 0.151            |
| LVE 3 & 4    | 0.075    | 0.005 | 16.499  | < .001*** | 0.127            |
| IPPA 15 & 19 | 0.060    | 0.006 | 9.995   | < .001*** | 0.070            |
| IPPA 16 & 24 | 0.076    | 0.006 | 12.974  | < .001*** | 0.090            |
| IPPA 13 & 21 | 0.076    | 0.004 | 17.453  | < .001*** | 0.102            |
| IPPA 1 & 4   | 0.051    | 0.009 | 5.803   | < .001*** | 0.069            |
| MOPS 5 & 13  | 0.051    | 0.006 | 9.096   | < .001*** | 0.101            |
| MOPS 12 & 8  | 0.036    | 0.005 | 7.133   | < .001*** | 0.081            |

| Parameters                                                          | Estimate | <i>SE</i> | <i>z</i> -value | <i>p</i> -value | Std. estimate |
|---------------------------------------------------------------------|----------|-----------|-----------------|-----------------|---------------|
| MOPS 2 & 14                                                         | 0.052    | 0.005     | 10.053          | < .001***       | 0.144         |
| MOPS 15 & 7                                                         | 0.051    | 0.006     | 8.184           | < .001***       | 0.129         |
| MOPS 1 & 4                                                          | 0.210    | 0.010     | 20.570          | < .001***       | 0.572         |
| MOPS 3 & 6                                                          | 0.031    | 0.022     | 1.369           | < .001***       | 0.061         |
| <b>R<sup>2</sup> (Coefficient of determination / Reliabilities)</b> |          |           |                 |                 |               |
| GSD                                                                 | 0.114    |           |                 |                 |               |
| GSI                                                                 | 0.081    |           |                 |                 |               |
| IWAH 1 & 4                                                          | 0.643    |           |                 |                 |               |
| IWAH 2 & 3                                                          | 0.739    |           |                 |                 |               |
| IWAH 6 & 7                                                          | 0.798    |           |                 |                 |               |
| IWAH 8 & 9                                                          | 0.809    |           |                 |                 |               |
| ZKE 1 & 3                                                           | 0.853    |           |                 |                 |               |
| ZKE 2 & 4                                                           | 0.882    |           |                 |                 |               |
| EPEP 1 & 4                                                          | 0.855    |           |                 |                 |               |
| EPEP 2 & 3                                                          | 0.876    |           |                 |                 |               |
| LVE 1 & 2                                                           | 0.849    |           |                 |                 |               |
| LVE 3 & 4                                                           | 0.873    |           |                 |                 |               |
| IPPA 15 & 19                                                        | 0.930    |           |                 |                 |               |
| IPPA 16 & 24                                                        | 0.910    |           |                 |                 |               |
| IPPA 13 & 21                                                        | 0.898    |           |                 |                 |               |
| IPPA 1 & 4                                                          | 0.931    |           |                 |                 |               |
| MOPS 5 & 13                                                         | 0.899    |           |                 |                 |               |
| MOPS 12 & 8                                                         | 0.919    |           |                 |                 |               |
| MOPS 2 & 14                                                         | 0.856    |           |                 |                 |               |
| MOPS 15 & 7                                                         | 0.871    |           |                 |                 |               |
| MOPS 1 & 4                                                          | 0.428    |           |                 |                 |               |
| MOPS 3 & 6                                                          | 0.939    |           |                 |                 |               |

*Notes.* *N* = 1539. *SE* = Standard error, Std. estimate = Standardized estimate (estimate in the fully standardized model). GSD = Global self-definition, GSI = Global self-investment, WrS = Warmth / Support, PoP = Positive parenting, Lve = Love, Trs = Trust, Cmm = Communication, Ind = Indifference, Abs = Abuse, Ovr = Over-control. The following abbreviations were used for the questionnaires: ZKE = „Zürcher Kurzfragebogen zum Erziehungsverhalten“, EPEP = “Evaluation des Pratiques Educatives Parentales”, LVE = items measuring parental love, IPPA = “Inventory of Parent and Peer Attachment”, IWAH = “Identification With All Humanity scale”.

\**p* < .05. \*\**p* < .01. \*\*\*. *p* < .001.

## 2 Figures

**Figure S1.** Density Plots for Global Self-Definition (GSD) and Global Self-Investment (GSI)

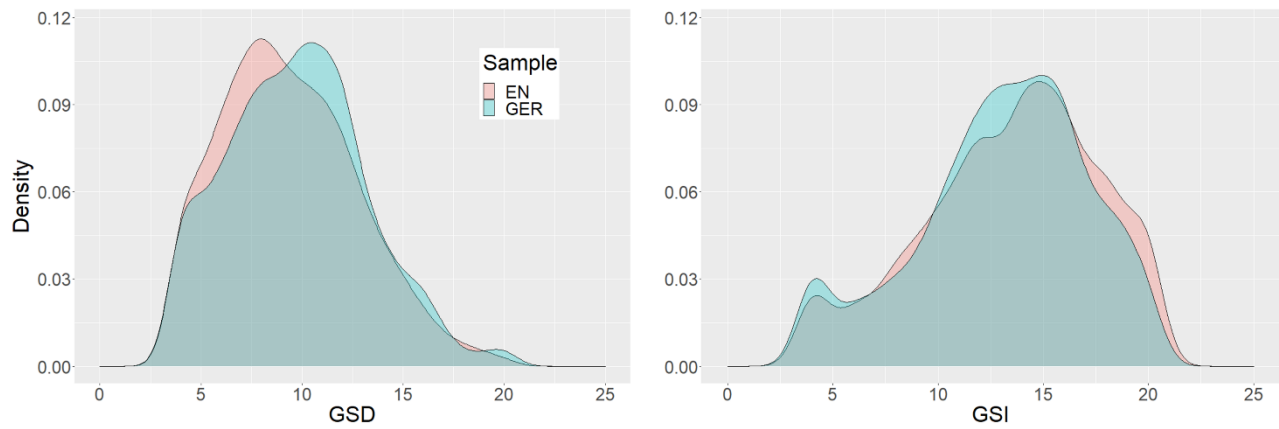

*Notes.* EN = English sample (red), GER = German sample (blue). Scales for GSD and GSI range from 4 to 20.

**Figure S2.** Density Plots for pRPB Variables: Warmth/Support, Positive Parenting, and Love

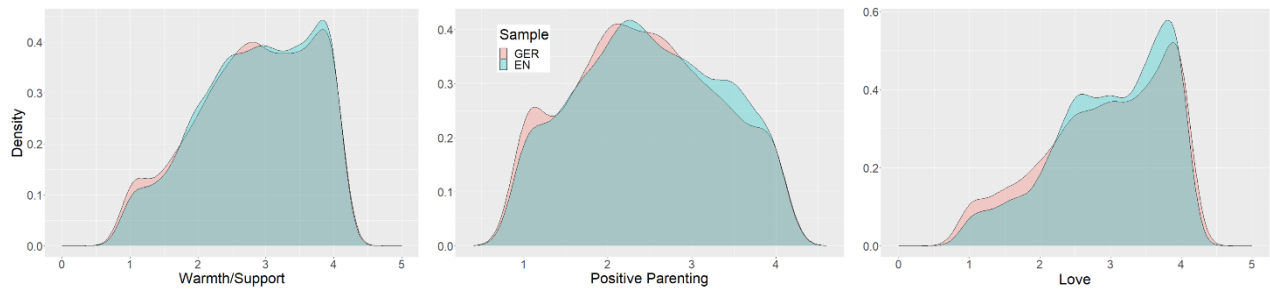

*Notes.* pRPB = Positive remembered parenting behavior. EN = English sample (red), GER = German sample (blue). Scales for all variables range from 1 to 4 as they were calculated by averaging the scores over all items belonging to one variable for both parents.

**Figure S3.** Density Plots for nRPB Variables: Indifference, Abuse, and Over-Control

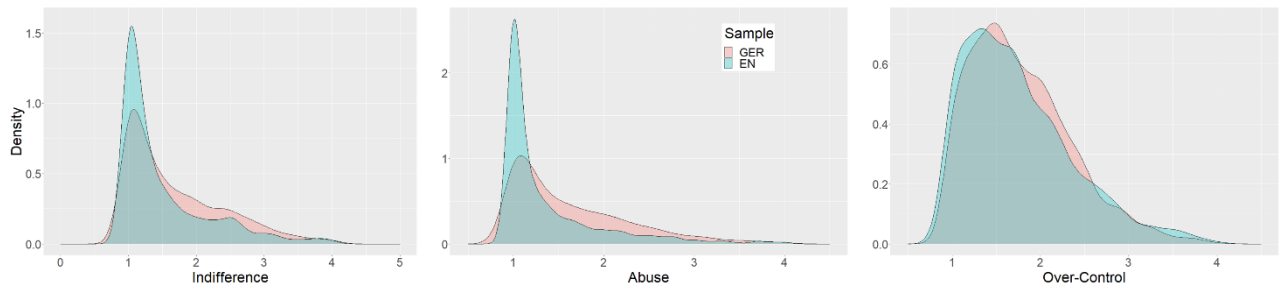

*Notes.* nRPB = Negative remembered parenting behavior. EN = English sample (red), GER = German sample (blue). All 15 items from the Measure of Parental Style (MOPS) were assessed by the participants. Scales for all variables range from 1 to 4 as they were calculated by averaging the scores over all items belonging to one variable for both parents.

**Figure S4.** Density Plots for Attachment Variables: Communication and Trust

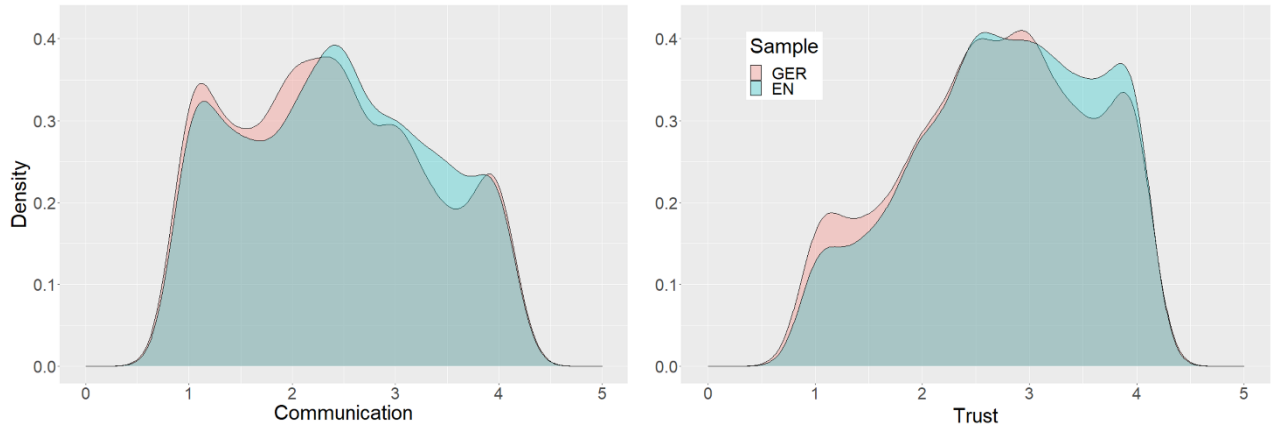

*Notes.* EN = English sample (red), GER = German sample (blue). Scales for all variables range from 1 to 4 as they were calculated by averaging the scores over all items belonging to one variable for both parents.

### 3 Identification With All Humanity Scale

The English and the German version of the IWAH scale as used in the present study:

| <b>Item</b> | <b>English version</b> , adapted version of the original scale by McFarland et al. (2012)                                                                                                                                                                                                                                                                                                                                                                                                                   | <b>German version</b> , adapted version of the German scale by Reese et al. (2015)                                                                                                                                                                                                                                                                                                                                                                                                                                                   |
|-------------|-------------------------------------------------------------------------------------------------------------------------------------------------------------------------------------------------------------------------------------------------------------------------------------------------------------------------------------------------------------------------------------------------------------------------------------------------------------------------------------------------------------|--------------------------------------------------------------------------------------------------------------------------------------------------------------------------------------------------------------------------------------------------------------------------------------------------------------------------------------------------------------------------------------------------------------------------------------------------------------------------------------------------------------------------------------|
| IWAH1       | <p>How close do you feel to each of the following groups? Please choose the letter that best represents your feelings on the following scale:</p> <p>A = not at all close; B = not very close; C = just a little or somewhat close; D = pretty close; E = very close</p> <ol style="list-style-type: none"> <li>1. People in my community</li> <li>2. English people</li> <li>3. Europeans</li> <li>4. Adherents of my religion / denomination<sup>1</sup></li> <li>5. People all over the world</li> </ol> | <p>Wie nahe fühlen Sie sich jeder dieser folgenden Gruppen? Bitte wählen Sie den Buchstaben aus, der auf der folgenden Skala Ihre Gefühle am besten wiedergibt:</p> <p>A = gar nicht nahe; B = nicht sehr nahe; C = ein bisschen nahe; D = ziemlich nahe; E = sehr nahe</p> <ol style="list-style-type: none"> <li>1. Menschen in meinem persönlichen Umfeld</li> <li>2. Deutsche</li> <li>3. Europäer*innen</li> <li>4. Anhänger*innen meiner Religion / Konfession<sup>1</sup></li> <li>5. Menschen auf der ganzen Welt</li> </ol> |
| IWAH2       | <p>How often do you use the word “we” to refer to the following groups of people?</p> <p>A = almost never; B = rarely; C = occasionally; D = often; E = very often</p> <ol style="list-style-type: none"> <li>1. People in my community</li> <li>2. English people</li> <li>3. Europeans</li> <li>4. Adherents of my religion / denomination<sup>1</sup></li> <li>5. People all over the world</li> </ol>                                                                                                   | <p>Wie oft benutzen Sie das Wort „wir“, wenn Sie über die folgenden Gruppen sprechen?</p> <p>A = fast nie; B = selten; C = ab und zu; D = oft; E = sehr oft</p> <ol style="list-style-type: none"> <li>1. Menschen in meinem persönlichen Umfeld</li> <li>2. Deutsche</li> <li>3. Europäer*innen</li> <li>4. Anhänger*innen meiner Religion/Konfession<sup>1</sup></li> <li>5. Menschen auf der ganzen Welt</li> </ol>                                                                                                               |

|                                                                                                                                                                                                                                                                                                                                                                                                                                                                                                                   |                                                                                                                                                                                                                                                                                                                                                                                                                                                                                                           |
|-------------------------------------------------------------------------------------------------------------------------------------------------------------------------------------------------------------------------------------------------------------------------------------------------------------------------------------------------------------------------------------------------------------------------------------------------------------------------------------------------------------------|-----------------------------------------------------------------------------------------------------------------------------------------------------------------------------------------------------------------------------------------------------------------------------------------------------------------------------------------------------------------------------------------------------------------------------------------------------------------------------------------------------------|
| <p>IWAH3 How much would you say you have in common with the following groups?</p> <p>A = almost nothing in common; B = little in common; C = some in common; D = quite a bit in common; E = very much in common</p> <ol style="list-style-type: none"> <li>1. People in my community</li> <li>2. English people</li> <li>3. Europeans</li> <li>4. Adherents of my religion / denomination<sup>1</sup></li> <li>5. People all over the world</li> </ol>                                                            | <p>Wie viel haben Sie Ihrer Meinung nach mit den folgenden Gruppen gemeinsam?</p> <p>A = fast nichts gemeinsam; B = wenig gemeinsam; C = etwas gemeinsam; D = ziemlich viel gemeinsam; E = sehr viel gemeinsam</p> <ol style="list-style-type: none"> <li>1. Menschen in meinem persönlichen Umfeld</li> <li>2. Deutsche</li> <li>3. Europäer*innen</li> <li>4. Anhänger*innen meiner Religion/Konfession<sup>1</sup></li> <li>5. Menschen auf der ganzen Welt</li> </ol>                                 |
| <p>IWAH4 Sometimes people think of those who are not part of their immediate family as “family”. To what degree do you think of the following groups of people as “family”?</p> <ol style="list-style-type: none"> <li>1. People in my community</li> <li>2. English people</li> <li>3. Europeans</li> <li>4. Adherents of my religion / denomination<sup>1</sup></li> <li>5. All humans everywhere<sup>2</sup></li> </ol> <p>A = not at all; B = just a little; C = somewhat; D = quite a bit; E = very much</p> | <p>Manchmal bezeichnen Menschen auf jene als „Familie“, die eigentlich nicht Teil der eigenen Familie sind. Wie sehr betrachten Sie die folgenden Gruppen als „Familie“?</p> <ol style="list-style-type: none"> <li>1. Menschen in meinem persönlichen Umfeld</li> <li>2. Deutsche</li> <li>3. Europäer*innen</li> <li>4. Anhänger*innen meiner Religion/Konfession<sup>1</sup></li> <li>5. Menschen auf der ganzen Welt</li> </ol> <p>A = gar nicht; B = kaum; C = ein wenig; D = ziemlich; E = sehr</p> |
| <p>IWAH5 How much do you identify with (that is, feel a part of, feel love towards, have concern for) each of the following?</p> <ol style="list-style-type: none"> <li>1. People in my community</li> <li>2. English people</li> <li>3. Europeans</li> <li>4. Adherents of my religion / denomination<sup>1</sup></li> <li>5. All humans everywhere<sup>2</sup></li> </ol> <p>A = not at all; B = just a little; C = somewhat; D = quite a bit; E = very much</p>                                                | <p>Wie sehr identifizieren Sie sich (d.h., fühlen Sie sich zugehörig, empfinden Sie Zuneigung, sorgen Sie sich um) mit jeder der folgenden Gruppen?</p> <ol style="list-style-type: none"> <li>1. Menschen in meinem persönlichen Umfeld</li> <li>2. Deutsche</li> <li>3. Europäer*innen</li> <li>4. Anhänger*innen meiner Religion/Konfession<sup>1</sup></li> <li>5. Menschen auf der ganzen Welt</li> </ol> <p>A = gar nicht; B = kaum; C = ein wenig; D = ziemlich; E = sehr</p>                      |

|                                                                                                                                                                                                                                                                                                                                                                                                                                                                  |                                                                                                                                                                                                                                                                                                                                                                                                                                                                                                                     |
|------------------------------------------------------------------------------------------------------------------------------------------------------------------------------------------------------------------------------------------------------------------------------------------------------------------------------------------------------------------------------------------------------------------------------------------------------------------|---------------------------------------------------------------------------------------------------------------------------------------------------------------------------------------------------------------------------------------------------------------------------------------------------------------------------------------------------------------------------------------------------------------------------------------------------------------------------------------------------------------------|
| <p>IWAH6 How much would you say you care (feel upset, want to help) when bad things happen to:</p> <ol style="list-style-type: none"> <li>1. People in my community</li> <li>2. English people</li> <li>3. Europeans</li> <li>4. Adherents of my religion / denomination<sup>1</sup></li> <li>5. People anywhere in the world<sup>2</sup></li> </ol> <p>A = not at all; B = just a little;<br/>C = somewhat; D = quite a bit;<br/>E = very much</p>              | <p>Wie betroffen fühlen Sie sich, wenn einer der folgenden Gruppen etwas Schlimmes passiert?</p> <ol style="list-style-type: none"> <li>1. Menschen in meinem persönlichen Umfeld</li> <li>2. Deutsche</li> <li>3. Europäer*innen</li> <li>4. Anhänger*innen meiner Religion/Konfession<sup>1</sup></li> <li>5. Menschen auf der ganzen Welt</li> </ol> <p>A = gar nicht; B = kaum; C = ein wenig;<br/>D = ziemlich; E = sehr</p>                                                                                   |
| <p>IWAH7 How much do you want to be:</p> <ol style="list-style-type: none"> <li>1. a responsible citizen of my community?</li> <li>2. a responsible English citizen?</li> <li>3. a responsible European citizen?</li> <li>4. a responsible member of my religious community / denomination<sup>1</sup></li> <li>5. a responsible citizen of the world?</li> </ol> <p>A = not at all; B = just a little;<br/>C = somewhat; D = quite a bit;<br/>E = very much</p> | <p>Wie sehr möchten Sie folgendes sein:</p> <ol style="list-style-type: none"> <li>1. ein verantwortungsvolles Mitglied in meinem persönlichen Umfeld</li> <li>2. ein*e verantwortungsvolle*r Bürger*in Deutschlands</li> <li>3. ein*e verantwortungsvolle*r Bürger*in Europas</li> <li>4. ein verantwortungsvolles Mitglied meiner Religion/Konfession<sup>1</sup></li> <li>5. ein*e verantwortungsvolle*r Bürger*in der Welt</li> </ol> <p>A = gar nicht; B = kaum; C = ein wenig;<br/>D = ziemlich; E = sehr</p> |
| <p>IWAH8 How much do you believe in:</p> <ol style="list-style-type: none"> <li>1. being loyal to your community?</li> <li>2. being loyal to England?</li> <li>3. being loyal to Europe?</li> <li>4. being loyal to your religion / denomination?<sup>1</sup></li> <li>5. being loyal to all mankind?</li> </ol> <p>A = not at all; B = just a little;<br/>C = somewhat; D = quite a bit;<br/>E = very much</p>                                                  | <p>Wie wichtig ist es Ihnen,</p> <ol style="list-style-type: none"> <li>1. Ihrem persönlichen Umfeld gegenüber aufrichtig zu sein?</li> <li>2. gegenüber Deutschland aufrichtig zu sein?</li> <li>3. gegenüber Europa aufrichtig zu sein?</li> <li>4. Ihrer Religion/Konfession gegenüber aufrichtig zu sein?<sup>1</sup></li> <li>5. gegenüber Menschen auf der ganzen Welt aufrichtig zu sein?</li> </ol> <p>A = gar nicht; B = kaum; C = ein wenig;<br/>D = ziemlich; E = sehr</p>                               |



---

|       |                                                                                                                                                                                                                                                                                                                                                                                                   |                                                                                                                                                                                                                                                                                                                                                                                                        |
|-------|---------------------------------------------------------------------------------------------------------------------------------------------------------------------------------------------------------------------------------------------------------------------------------------------------------------------------------------------------------------------------------------------------|--------------------------------------------------------------------------------------------------------------------------------------------------------------------------------------------------------------------------------------------------------------------------------------------------------------------------------------------------------------------------------------------------------|
| IWAH9 | <p>When they are in need, how much do you want to help:</p> <ol style="list-style-type: none"> <li>1. People in my community?</li> <li>2. English people?</li> <li>3. Europeans?</li> <li>4. Adherents of my religion / denomination<sup>1</sup></li> <li>5. People all over the world?</li> </ol> <p>A = not at all; B = just a little;<br/>C = somewhat; D = quite a bit;<br/>E = very much</p> | <p>Wie sehr möchten Sie folgenden Gruppen helfen, wenn diese Hilfe benötigen?</p> <ol style="list-style-type: none"> <li>1. Menschen in meinem persönlichen Umfeld Deutsche</li> <li>2. Europäer*innen</li> <li>3. Anhänger*innen meiner Religion/Konfession<sup>1</sup></li> <li>4. Menschen auf der ganzen Welt</li> </ol> <p>A = gar nicht; B = kaum; C = ein wenig;<br/>D = ziemlich; E = sehr</p> |
|-------|---------------------------------------------------------------------------------------------------------------------------------------------------------------------------------------------------------------------------------------------------------------------------------------------------------------------------------------------------------------------------------------------------|--------------------------------------------------------------------------------------------------------------------------------------------------------------------------------------------------------------------------------------------------------------------------------------------------------------------------------------------------------------------------------------------------------|

---

*Notes.* <sup>1</sup> Option 4 (‘Adherents of my religion / denomination’) was only presented to participants who had reported to be members of a religious congregation or community. <sup>2</sup> Within the items 4 to 6 and in the English sample only, participants who had reported to be members of a religious congregation or community were accidentally presented a different fifth response option than the other, non-religious participants. Instead of the original (correct) names for the fifth response option displayed above, which were “All humans everywhere” (items 4 and 5) and „People anywhere in the world“ (item 6), religious participants were shown the option “People all over the world” for all three items.

#### 4 References

- Jorgensen, T. D., Pornprasertmanit, S., Schoemann, A. M., and Rosseel, Y. (2022). *semTools: Useful tools for structural equation modeling*. R package version 0.5-6. <https://CRAN.R-project.org/package=semTools>.
- McFarland, S., Webb, M., and Brown, D. (2012). All humanity is my ingroup: a measure and studies of identification with all humanity. *Journal of Personality and Social Psychology* 103, 830–853. doi: 10.1037/a0028724.
- Raykov, T., and Shrout, P. E. (2002). Reliability of scales with general structure: Point and interval estimation using a structural equation modeling approach. *Structural Equation Modeling: A Multidisciplinary Journal* 9, 195–212. doi: 10.1207/S15328007SEM0902\_3.
- Reese, G., Proch, J., and Finn, C. (2015). Identification with all humanity: The role of self-definition and self-investment. *European Journal of Social Psychology* 45, 426–440. doi: 10.1002/ejsp.2102.
